# Supplementary material for: Increased Interferon-Induced Protein With Tetracopeptides (IFITs) Reduces Mycobacterial Growth
Source: PubMed Central journal article supplement (PMC9296360; doi:10.3389/fcimb.2022.828439), 2022-07-05
Supplement: DataSheet_1.pdf [file DataSheet_1.pdf]

## Supplementary data

### Table of Contents

|                                                                                                                                                                                           |    |
|-------------------------------------------------------------------------------------------------------------------------------------------------------------------------------------------|----|
| <b>Supplementary Figure 1:</b> Flow of methodology adopted for the knock-up and knock-down experiments.....                                                                               | 2  |
| <b>Supplementary Figure 2:</b> Flow diagram depicting the effect of co-stimulation with IFN- $\alpha$ , IFN- $\beta$ and IFN- $\gamma$ on expression of IFITs.....                        | 3  |
| <b>Supplementary Figure 3:</b> Flow diagram describing knock-up and knock-down of IFITs.....                                                                                              | 4  |
| <b>Supplementary Figure 5:</b> Titration of IFITs for knock-up at different concentrations .....                                                                                          | 6  |
| <b>Supplementary Figure 6:</b> Viability of THP-1 cells after knock-down and knock-up of <i>IFITs</i> .....                                                                               | 7  |
| <b>Supplementary Figure 7:</b> Comparison of bacterial uptake by THP-1 cells across different mycobacterial species .....                                                                 | 8  |
| <b>Supplementary Figure 8a:</b> Fold changes of different mRNA detected by qRT-PCR for clinical and <i>in vitro</i> protocol.....                                                         | 9  |
| <b>Supplementary Figure 8b:</b> Fold changes of different mRNA detected by qRT-PCR for clinical and <i>in vitro</i> protocol.....                                                         | 10 |
| <b>Supplementary Figure 8c:</b> Fold changes of different mRNA detected by qRT-PCR for clinical and <i>in vitro</i> protocol.....                                                         | 11 |
| <b>Supplementary Table 1:</b> Demographic and clinical information of study participants.....                                                                                             | 12 |
| <b>Supplementary Table 2:</b> Effect of <i>in vitro</i> knock-up and knock-down of IFITs on CFUs of <i>M. smegmatis</i> , <i>M. bovis</i> BCG and <i>M. tb</i> R179.....                  | 13 |
| <b>Supplementary Table 3:</b> Mycobacterial species and plasmids used for the <i>in vitro</i> knock-up and knock-down of <i>IFITs</i> in the study. ....                                  | 15 |
| <b>Supplementary Table 4:</b> Cytokines expression (pg/ml) 12 hours post <i>M. smegmatis</i> infection†. Compared to <i>M. smegmatis</i> infected THP-1 cells without intervention, ..... | 16 |
| <b>Supplementary Table 5:</b> Cytokine expression (pg/ml) after 12 and 96 hours of <i>M. bovis</i> BCG infection. Compared to BCG infected THP-1 cells without intervention .....         | 19 |
| <b>Supplementary Table 6:</b> Cytokines expression (pg/ml) after 12 and 96 hours of <i>M. tb</i> R179 infection of THP-1 cells.....                                                       | 24 |

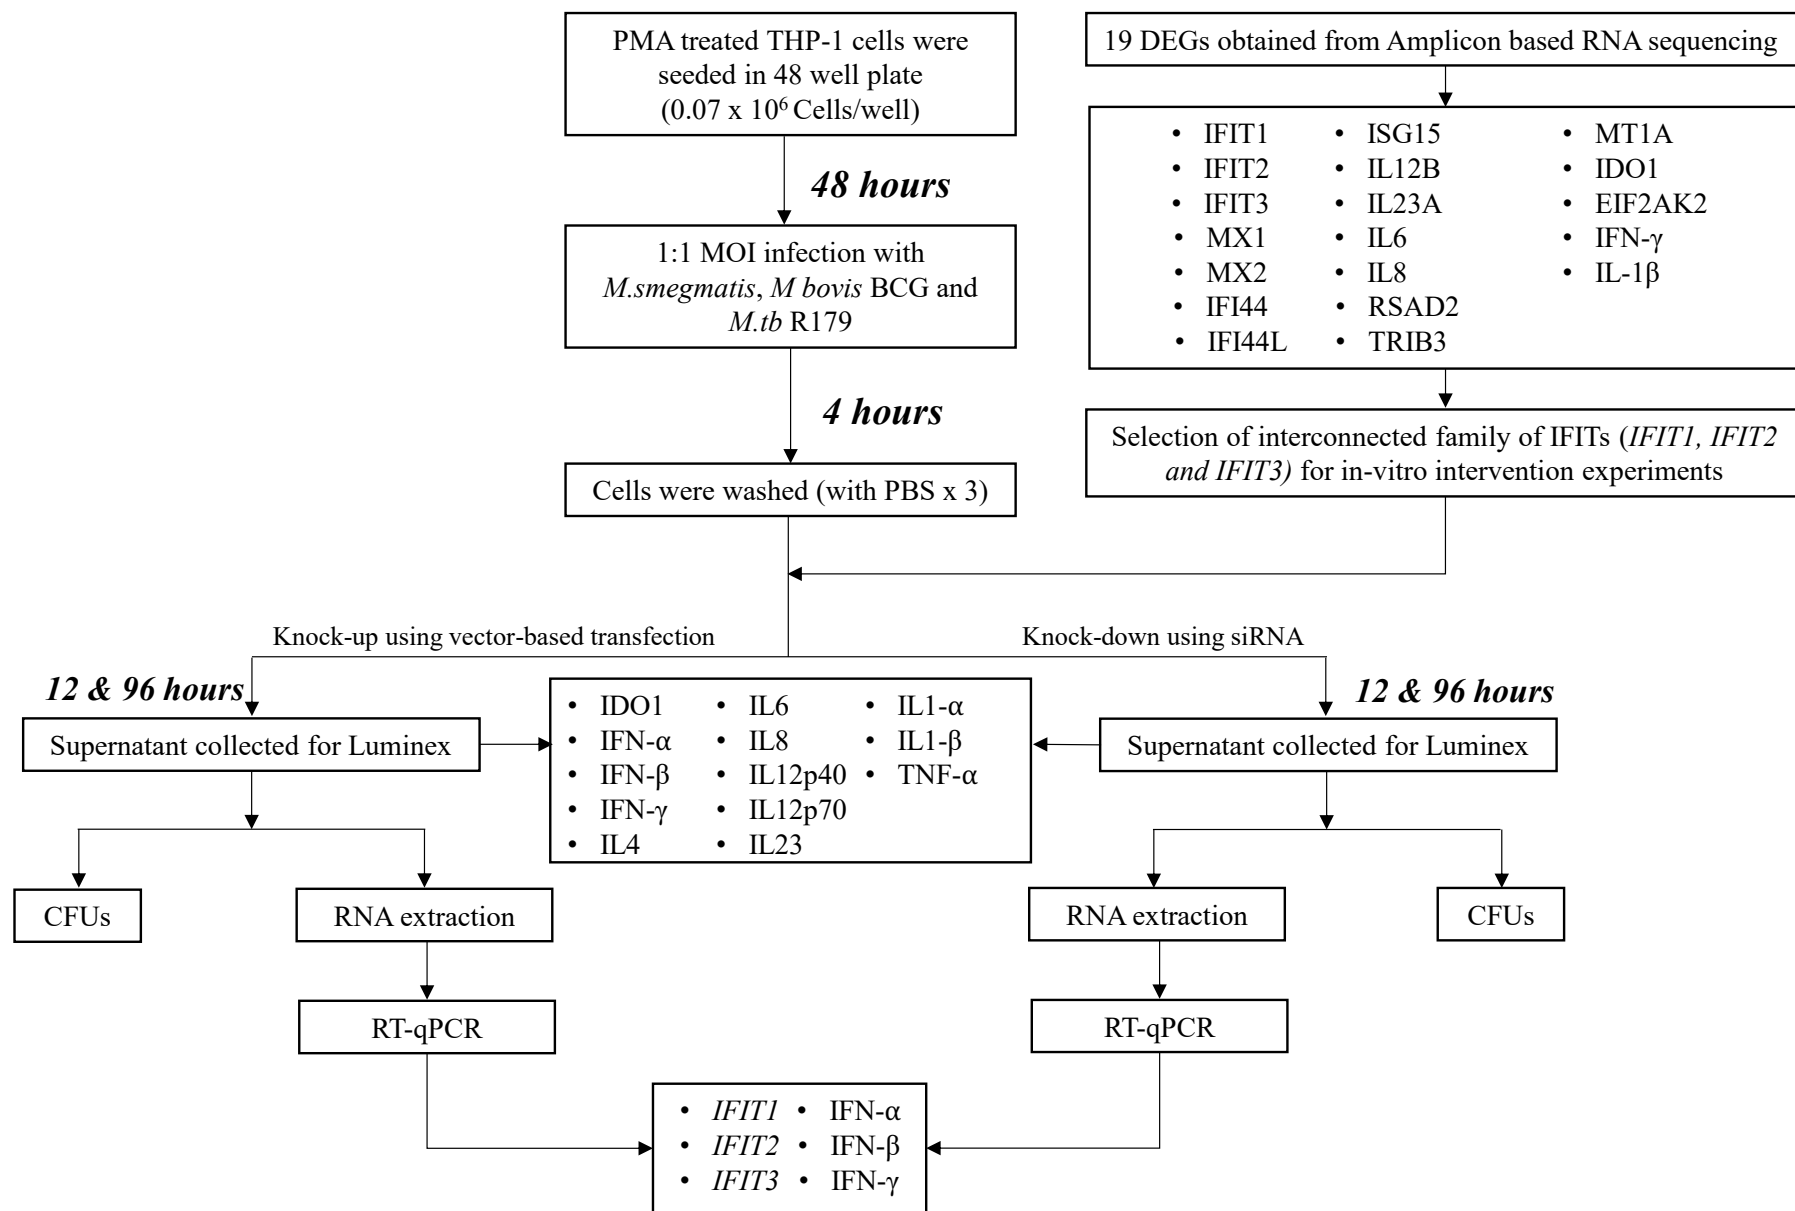

**Supplementary Figure 1:** Flow of methodology adopted for the knock-up and knock-down experiments.

*Abbreviations:* CFUs= colony forming units, BCG=Bacillus Calmette–Guerin, DEGs= Differentially expressed genes, EIF2AK2=eukaryotic translation initiation factor 2 alpha kinase 2, FDR=false discovery rate, IDO=indoleamine 2,3-dioxygenase, hMDMs=human monocyte-derived macrophages, IFI=interferon-induced protein, IFIT=interferon-induced protein with tetratricopeptide, IFN=interferon gamma, IL=interleukin, ISG=interferon-stimulated gene, MOI= multiplicity of infection, MTA=metastasis-associated protein, MX=interferon-induced GTP binding protein, PMA= Phorbol 12-myristate 13-acetate, RSAD=radical S-adenosyl methionine domain-containing protein 2, qRT-PCR= Quantitative reverse transcription polymerase chain reaction, TRIB= triple homolog, UBC=polyubiquitin-C.

**A**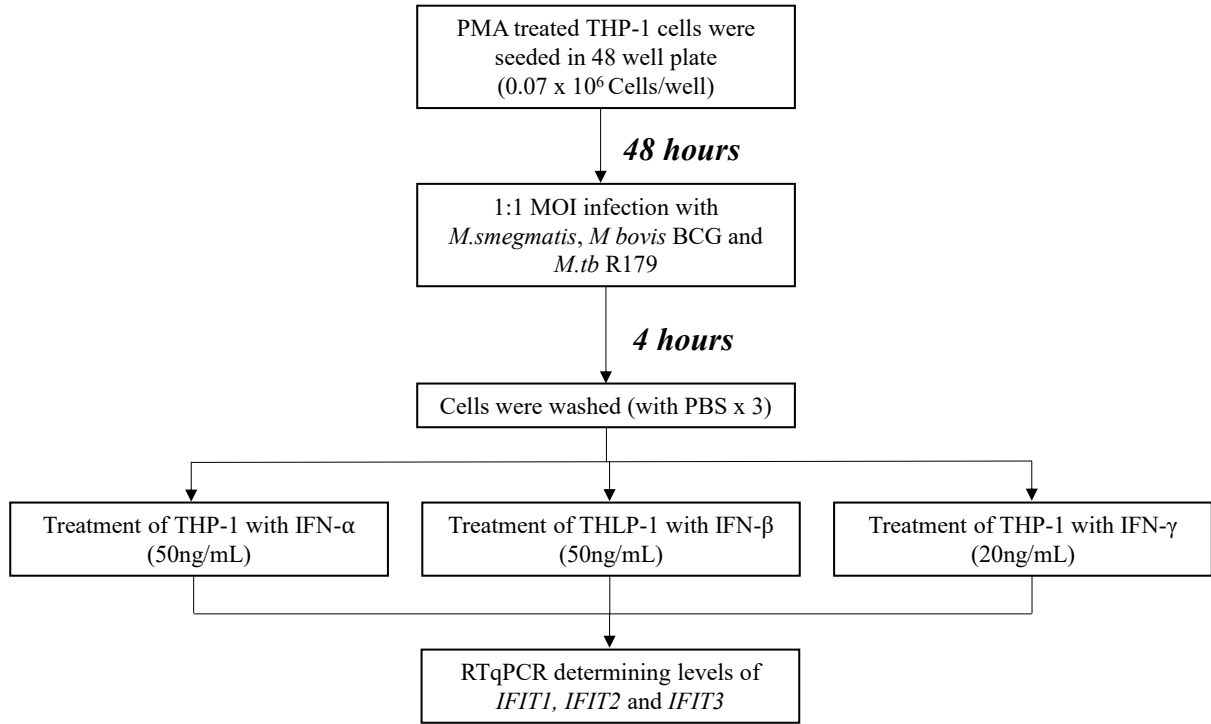**B**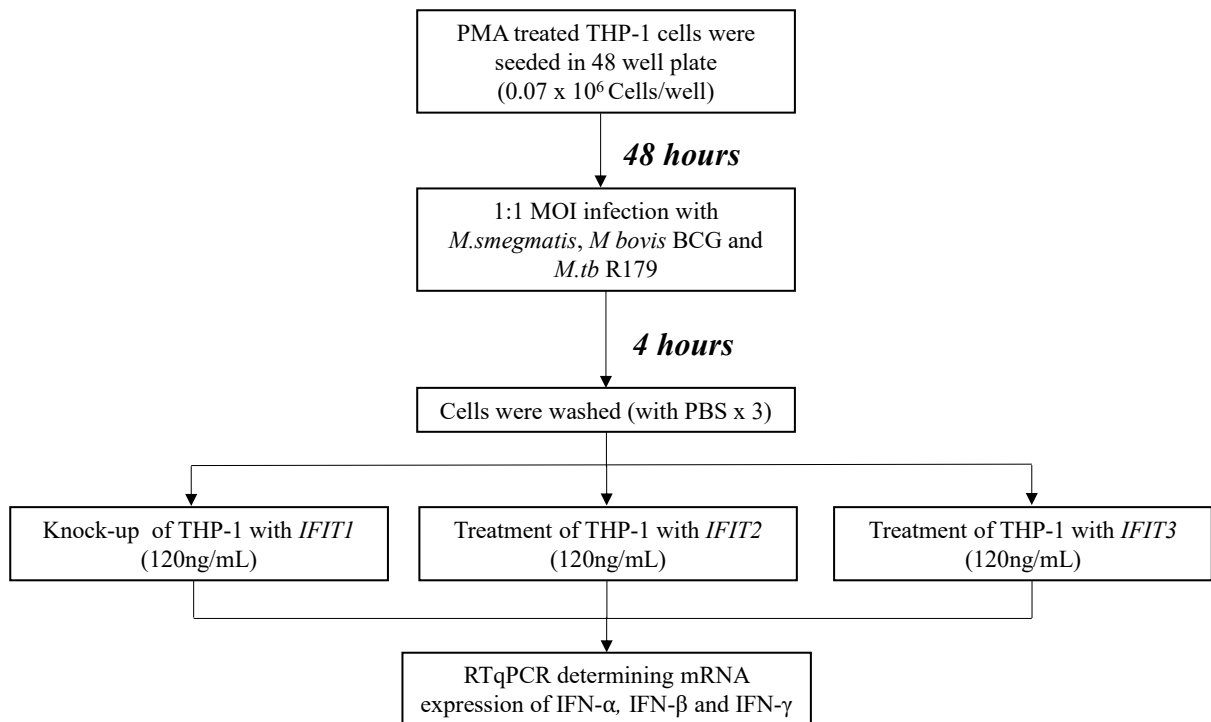

**Supplementary Figure 2:** Flow diagram depicting the effect of co-stimulation with IFN- $\alpha$ , IFN- $\beta$  and IFN- $\gamma$  on expression of IFITs determined by qRT-PCR (A) and the effect of knock-up of *IFITs* on the mRNA expression of IFN- $\alpha$ , IFN- $\beta$  and IFN- $\gamma$  (B).

*Abbreviations:* PMA= Phorbol Myristate Acetate, MOI= Multiplicity of infection, BCG= Bacillus Calmette-Guérin, PBS= Phosphate-buffered saline, THP-1 cells= human monocyte derived macrophages, IFN= Interferon, IFIT= Interferon-induced protein with tetratricopeptide repeats

**A**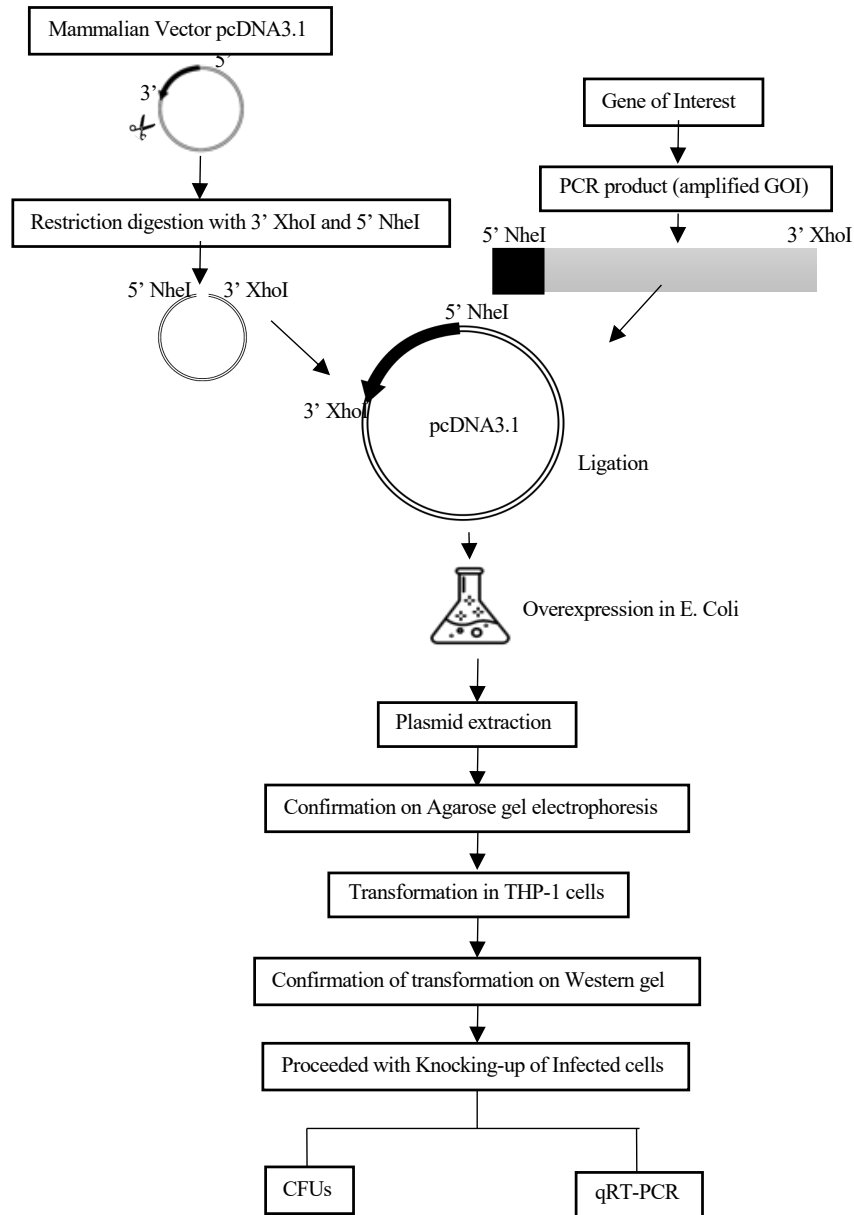**B**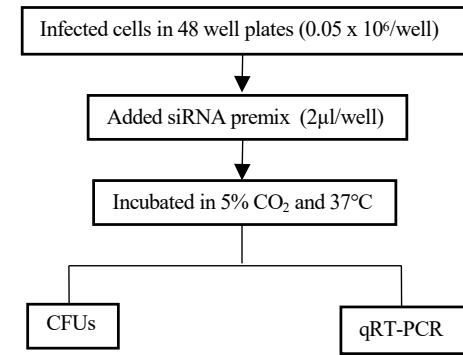

**Supplementary Figure 3:** Flow diagram describing knock-up and knock-down of IFITs. Flow depicts (A) cloning and vector (*E. Coli*) derived overexpression of *IFITs* (knock-up) and (B) siRNA targeting *IFITs* (knock-down) in THP-1 cells.

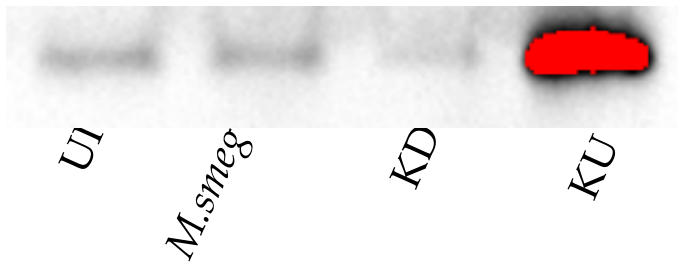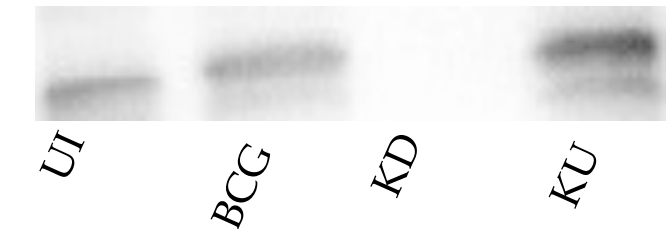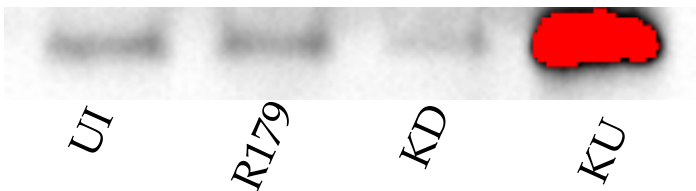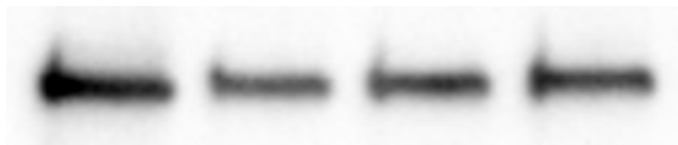

GAPDH

**Supplementary Figure 4:** Representative Western Blot confirming knock-down and knock-up (vector based overexpression) of IFIT1 in THP-1 infected with *M.smegmatis*, *M bovis BCG*, and *R179* at 12-hours post infection (*IFIT1*-55KDa, *GAPDH*-37KDa)  
 Abbreviations: KD=Knock-down, KU=Knock-up, UI=Uninfected

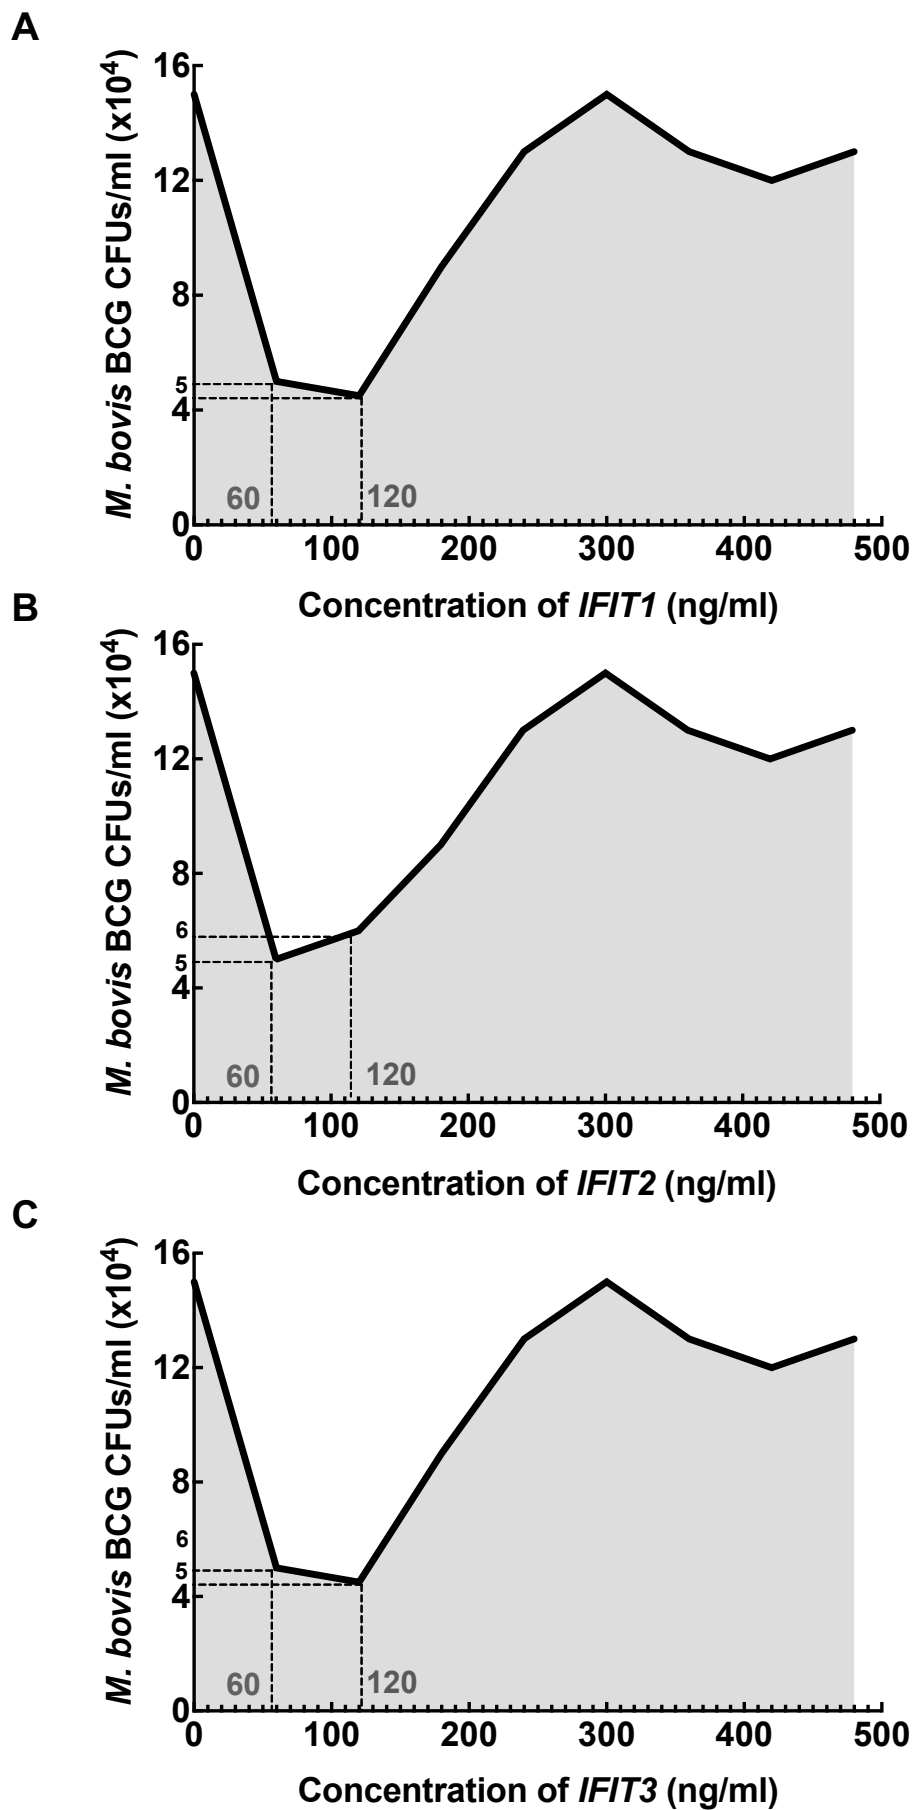

**Supplementary Figure 5:** Titration of IFITs for knock-up at different concentrations. Panel shows (A) *IFIT1*, (B) *IFIT2* and (C) *IFIT3* at different concentrations for knock-up in colony forming units of *M. bovis* BCG. We found concentration of 120 ng/ml to be most effective in reducing *in vitro* CFUs of BCG. Abbreviation: BCG= Bacillus Calmette–Guerin, IFIT= interferon-induced protein with tetratricopeptide.

**A**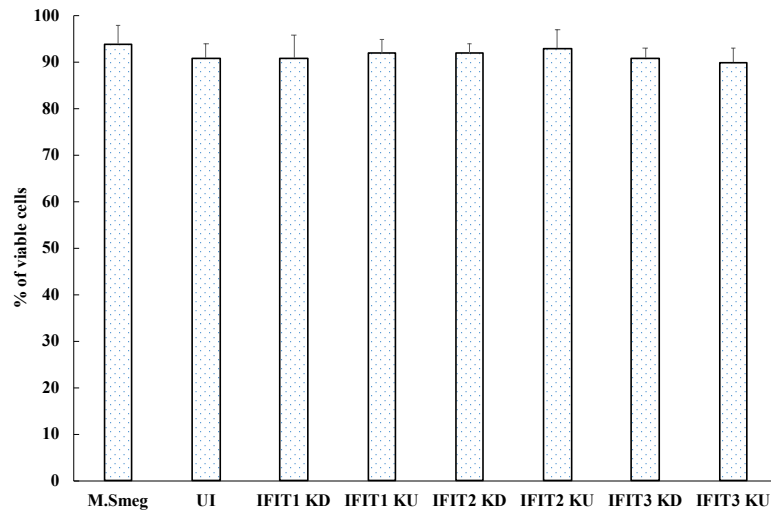**B**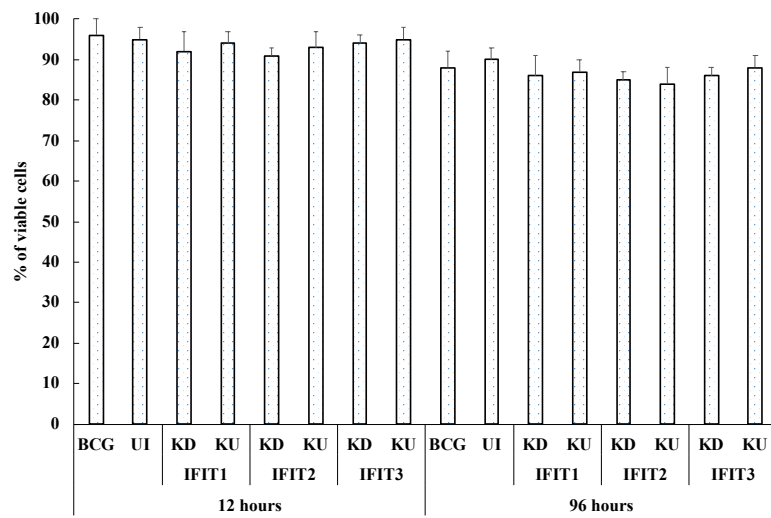**C**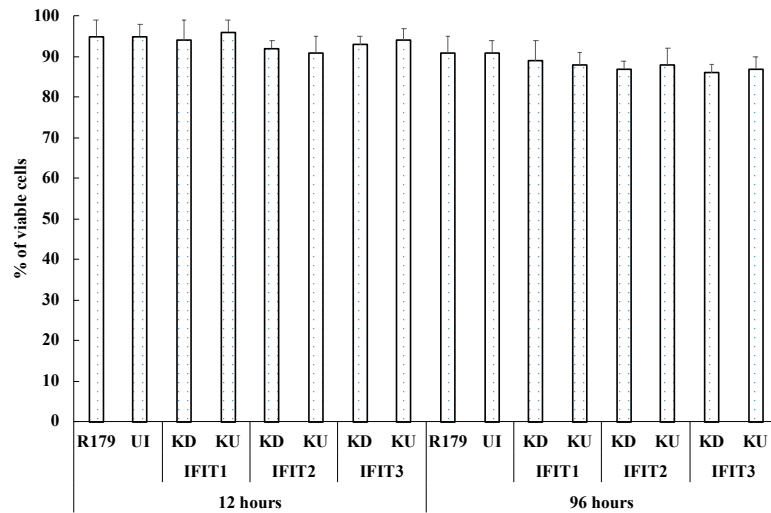

**Supplementary Figure 6:** Viability of THP-1 cells after knock-down and knock-up of *IFITs* infected with A) *M. smegmatis*, B) *M. bovis* BCG and C) *M. tb* R179. The viability of the cells was found to be >85%, which was consistent and similar across the three species and knock-up and knock-down.

*Abbreviations:* KD= Knock-down, KU= Knock-up, UI= Uninfected

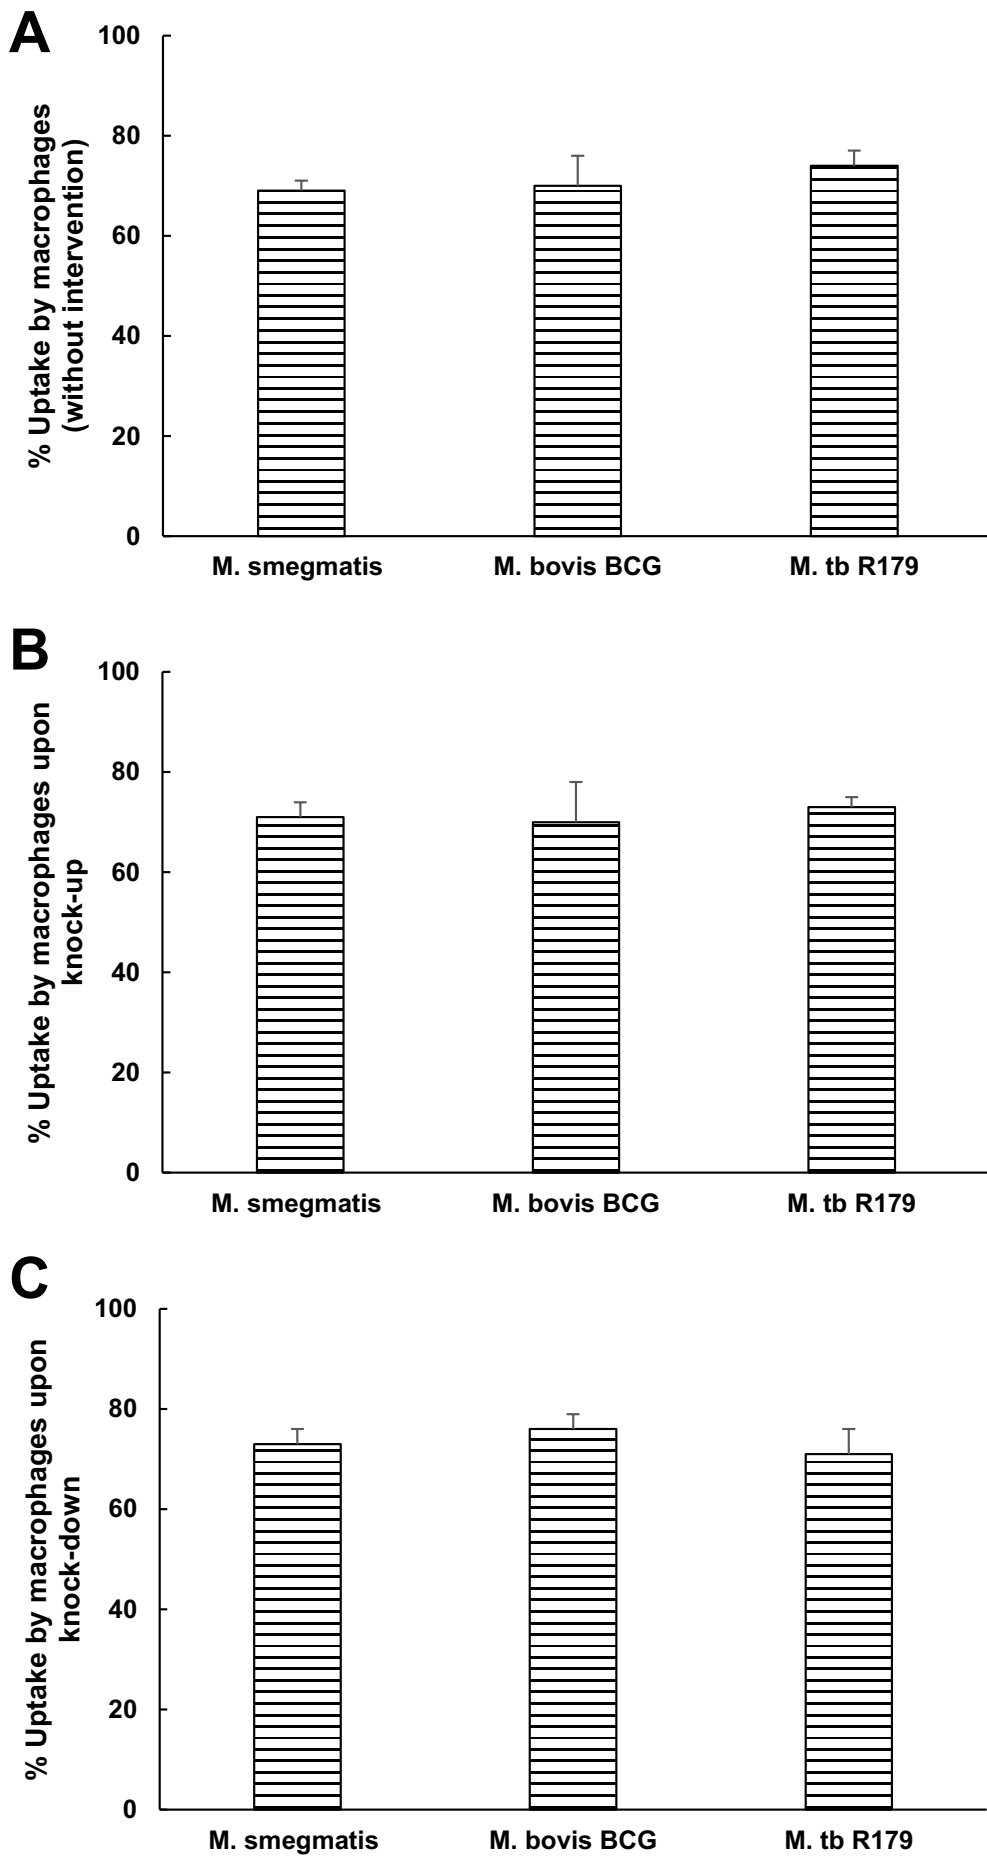

**Supplementary Figure 7:** Comparison of bacterial uptake by THP-1 cells across different mycobacterial species without intervention (A), after knock-up (B) and knock-down (C) of IFITs. The bacterial uptakes were found to be similar across different



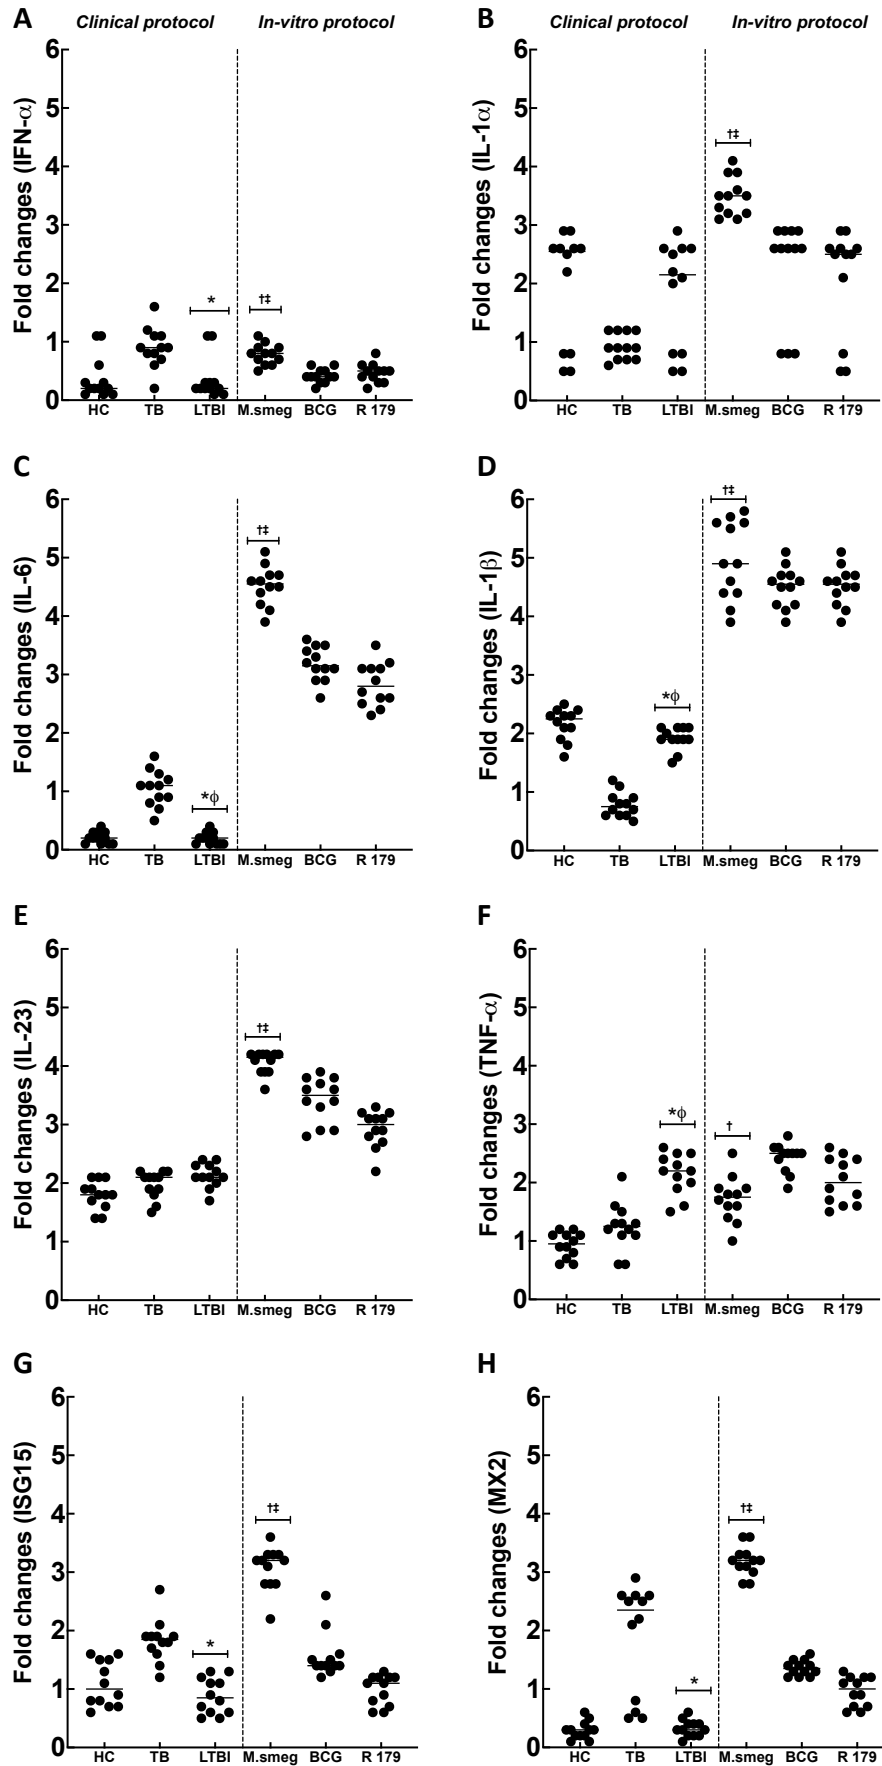

**Supplementary Figure 8a:** Fold changes of different mRNA detected by qRT-PCR for clinical and *in vitro* protocol. Compared to TB cases IFN- $\alpha$ , IL-6, ISG15 and MX2 were found to be lower, while TNF- $\alpha$  and IL-1 $\beta$  found to be higher in LTBI cases. For *in vitro* protocol, fold changes for *M. smegmatis* were found to be higher than *M. bovis* BCG and *M. tb* R179.

\*= vs. TB,  $\phi$ = vs. HC, †= vs. BCG, and ‡= vs. R179

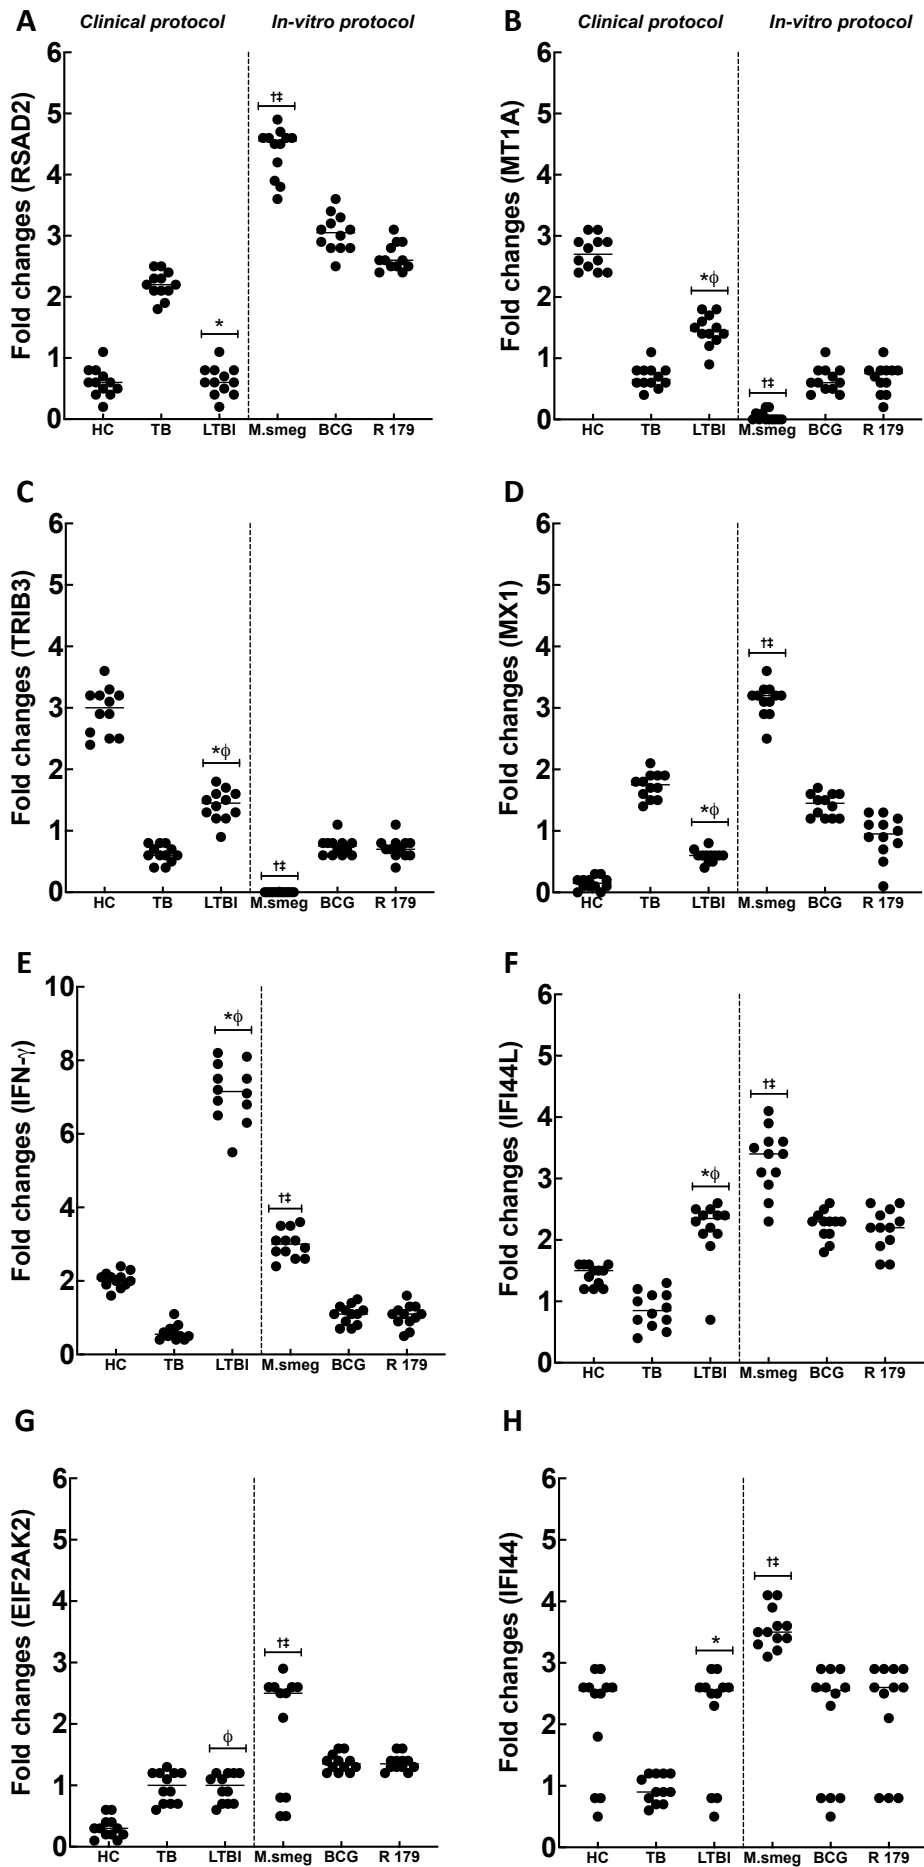

**Supplementary Figure 8b:** Fold changes of different mRNA detected by qRT-PCR for clinical and *in vitro* protocol. Compared to TB cases IFN- $\gamma$ , TRIB3, MT1A, IFI44 and IFI44L were found to be lower, while RSAD2 and MX1 found to be higher in LTBI cases. For *in vitro* protocol, fold changes of RSAD2, MX1, IFN- $\gamma$ , IFI44, IFI44L and EIF2AK2 were found to be higher, while TRIB3 and MT1A were lower for *M. smegmatis* compared to *M. bovis* BCG and *M. tb* R179.

\*= vs. TB,  $\phi$ = vs. HC,  $\dagger$ = vs. BCG, and  $\ddagger$ = vs. R179

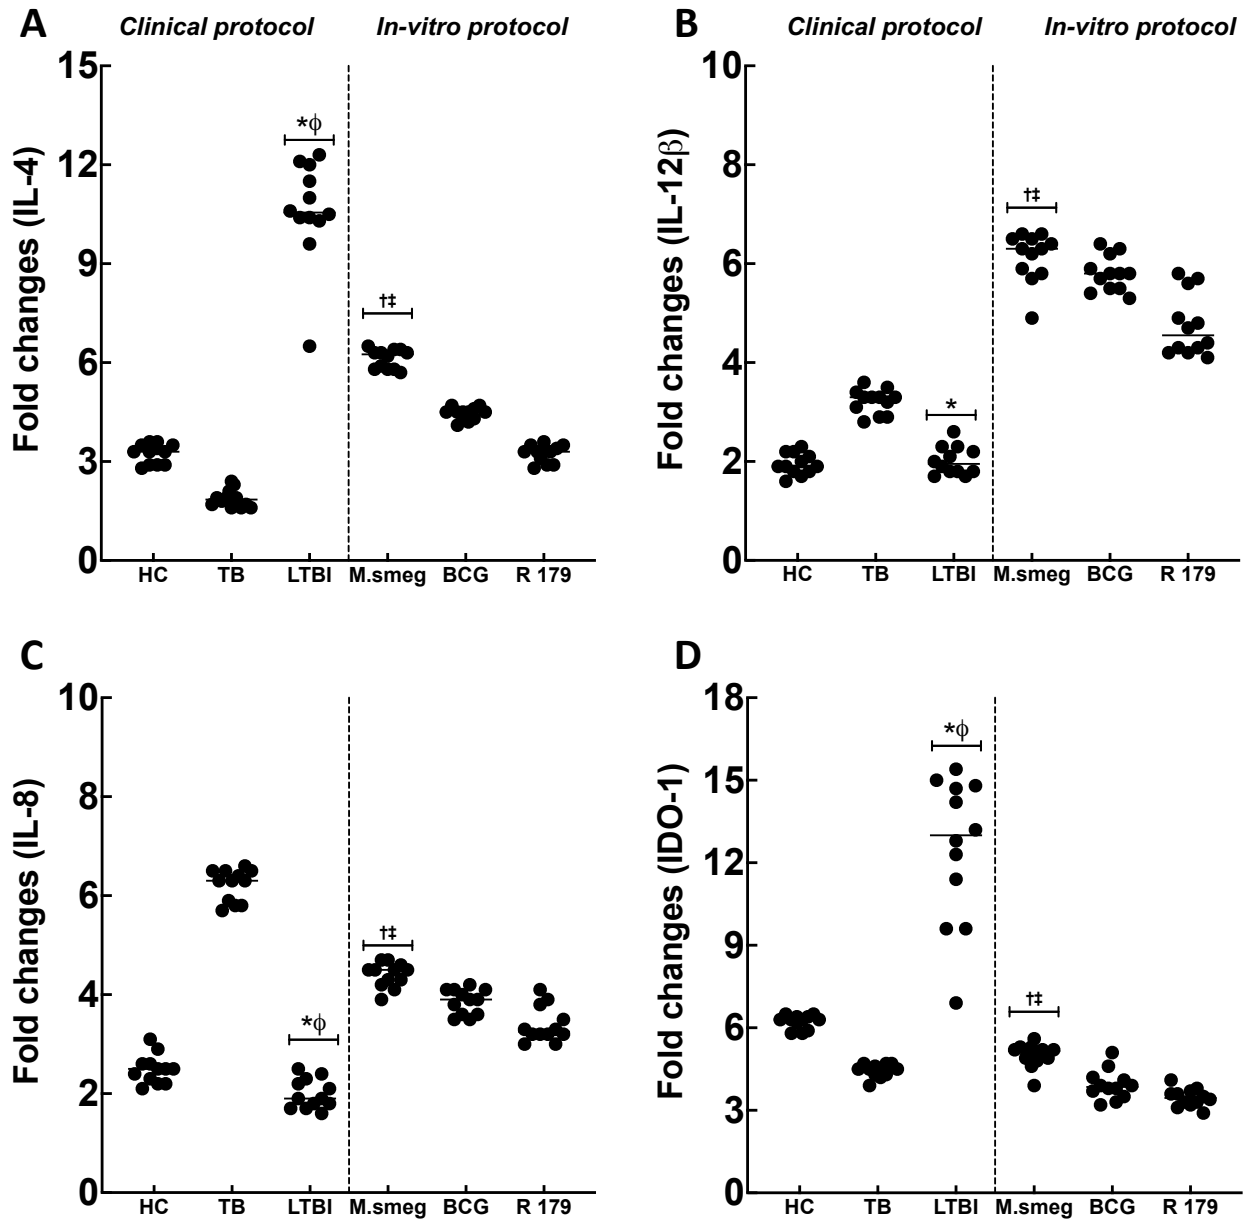

**Supplementary Figure 8c:** Fold changes of different mRNA detected by qRT-PCR for clinical and *in vitro* protocol. Compared to TB cases IL-4 and IDO-1 were found to be lower, while IL-8 and IL-12β found to be higher in LTBI cases. For *in vitro* protocol, fold changes were found to be higher in *M. smegmatis* compared to *M. bovis* BCG and *M. tb* R179.

\*= vs. TB, φ= vs. HC, †= vs. BCG, and ‡= vs. R179

- 1 **Supplementary Table 1:** Demographic and clinical information of study participants. Data  
 2 presented as mean  $\pm$  S.D, median (IQR), and n/N (%).

|                                    | <i>In vitro</i> protocol | Clinical protocol (n=24) |                              |
|------------------------------------|--------------------------|--------------------------|------------------------------|
|                                    | Healthy controls (n=12)  | LTBI cases (n=12)        | Active TB cases (n=12)       |
| <b>Age (Years)</b><br>Median (IQR) | 27<br>(26-28.5)          | 37.2<br>(30.8-56.7)      | 49.5<br>(36.5-57)<br>p=0.406 |
| <b>Gender (%)</b>                  |                          |                          |                              |
| <b>Female</b>                      | 6/12 (50)                | 9/12 (75)                | 6/12 (33)                    |
| <b>Male</b>                        | 6/12 (50)                | 3/12 (25)                | 6/12 (67)<br>p=0.206         |
| <b>BMI (kg/m<sup>2</sup>)</b>      | 23.59 $\pm$ 2.3          | 27.44 $\pm$ 9.1          | 26.36 $\pm$ 5.2<br>p=0.725   |

- 3 *Abbreviations:* BMI= body mass index, LTBI= latent tuberculosis infection, TB= Tuberculosis

**Supplementary Table 2:** Effect of in vitro knock-up and knock-down of IFITs on CFUs of *M. smegmatis*, *M. bovis* BCG and *M. tb* R179. Compared to untreated CFUs, we observed significant reduction in CFUs after knock-up of individual *IFIT1*, *IFIT2* and *IFIT3*. Also, higher CFUs observed after knock-down of individual *IFITs*. Combined effect of *IFITs* during knock-up and knock-down found to increase the survivability of *in vitro* CFUs. Results represented as increase (+%) or decrease (-%) in CFUs compared to untreated wells. Data represented as n and n/N (%).

|                              | Untreated CFUs | CFUs after Knock-up (x10 <sup>4</sup> ) |                       |                                   |                            | CFUs after Knock-down (x10 <sup>4</sup> ) |                       |                                   |                              |
|------------------------------|----------------|-----------------------------------------|-----------------------|-----------------------------------|----------------------------|-------------------------------------------|-----------------------|-----------------------------------|------------------------------|
|                              |                | <i>IFIT1</i>                            | <i>IFIT2</i>          | <i>IFIT3</i>                      | Average effect of knock-up | <i>IFIT1</i>                              | <i>IFIT2</i>          | <i>IFIT3</i>                      | Average effect of knock-down |
| <b><i>M. smegmatis</i></b>   |                |                                         |                       |                                   |                            |                                           |                       |                                   |                              |
| At 12 hours                  | 41             | 30                                      | 29                    | 26                                | -31%                       | 85                                        | 89                    | 90                                | +115%                        |
| % Change from untreated CFUs |                | -11/41 (-27%)                           | -12/41 (-29%)         | -15/41 (-37%)                     |                            | +44/41 (+107%)                            | +48/41 (+117%)        | +49/41 (+120%)                    |                              |
|                              |                | p<0.0001*                               | p<0.0001*<br>p=0.806† | p<0.0001*<br>p=0.343†<br>p=0.481‡ |                            | p<0.0001*                                 | p<0.0001*<br>p=0.232† | p<0.0001*<br>p=0.156†<br>p=0.812‡ |                              |
| At 24 hours                  | 15             | 8                                       | 7                     | 6                                 | -53%                       | 26                                        | 26                    | 28                                | +78%                         |
| % Change from untreated CFUs |                | -7/15 (-47%)                            | -8/15 (-53%)          | -9/15 (-60%)                      |                            | +11/15 (+73%)                             | +11/15 (+73%)         | +13/15 (+87%)                     |                              |
|                              |                | p=0.001*                                | p=0.003*<br>p=0.715†  | p=0.006*<br>p=0.464†<br>p=0.713‡  |                            | p=0.003*                                  | p=0.003*<br>p>0.999†  | p=0.002*<br>p=0.761†<br>p=0.761‡  |                              |
| <b><i>M. bovis</i> BCG</b>   |                |                                         |                       |                                   |                            |                                           |                       |                                   |                              |
| At 12 hours                  | 60             | 39                                      | 39                    | 40                                | -34%                       | 86                                        | 88                    | 87                                | +45%                         |
| % Change from untreated CFUs |                | -21/60 (-35%)                           | -21/60 (-35%)         | -20/60 (-33%)                     |                            | +26/60 (+43%)                             | +28/60 (+47%)         | +27/60 (+45%)                     |                              |
|                              |                | p<0.0001*                               | p<0.0001*<br>p>0.999† | p<0.0001*<br>p=0.847†<br>p=0.847‡ |                            | p<0.0001*                                 | p<0.0001*<br>p=0.821† | p<0.0001*<br>p=0.909†<br>p=0.911‡ |                              |

Continue...

|                                                  |    |                         |                                             |                                                                     |      |                        |                                             |                                                                     |      |
|--------------------------------------------------|----|-------------------------|---------------------------------------------|---------------------------------------------------------------------|------|------------------------|---------------------------------------------|---------------------------------------------------------------------|------|
| <i>At 96 hours</i>                               | 71 | 49                      | 49                                          | 51                                                                  | -30% | 97                     | 101                                         | 102                                                                 | +41% |
| <i>% Change from untreated CFUs</i>              |    | -22/71<br>(-31%)        | -22/71<br>(-31%)                            | -20/71<br>(-29%)                                                    |      | +26/71<br>(+37%)       | +30/71<br>(+42%)                            | +31/71<br>(+44%)                                                    |      |
|                                                  |    | <b>p&lt;0.0001*</b>     | <b>p&lt;0.0001*</b><br>p>0.999 <sup>†</sup> | <b>p&lt;0.0001*</b><br>p=0.713 <sup>‡</sup><br>p=0.713 <sup>‡</sup> |      | <b>p&lt;0.0001*</b>    | <b>p&lt;0.0001*</b><br>p=0.651 <sup>†</sup> | <b>p&lt;0.0001*</b><br>p=0.576 <sup>‡</sup><br>p=0.915 <sup>‡</sup> |      |
| <b><i>M. tb</i> R179</b>                         |    |                         |                                             |                                                                     |      |                        |                                             |                                                                     |      |
| <i>At 12 hours</i>                               | 51 | 39                      | 39                                          | 38                                                                  | -24% | 84                     | 89                                          | 89                                                                  | +69% |
| <i>% Change from untreated CFUs</i>              |    | -12/51<br>(-24%)        | -12/51<br>(-24%)                            | -13/51<br>(-25%)                                                    |      | +33/51<br>(+65%)       | +36/51<br>(+71%)                            | +36/51<br>(+71%)                                                    |      |
|                                                  |    | <b>p&lt;0.0001*</b>     | <b>p&lt;0.0001*</b><br>p>0.999 <sup>†</sup> | <b>p&lt;0.0001*</b><br>p=0.818 <sup>‡</sup><br>p=0.818 <sup>‡</sup> |      | <b>p&lt;0.0001*</b>    | <b>p&lt;0.0001*</b><br>p=0.649 <sup>†</sup> | <b>p&lt;0.0001*</b><br>p=0.649 <sup>†</sup><br>p>0.999 <sup>‡</sup> |      |
| <i>At 96 hours</i>                               | 74 | 43                      | 42                                          | 41                                                                  | -43% | 99                     | 100                                         | 99                                                                  | +34% |
| <i>% Change from untreated CFUs</i>              |    | -31/74<br>(-42%)        | -32/74<br>(-43%)                            | -33/74<br>(-45%)                                                    |      | +25/74<br>(+34%)       | +26/74<br>(+35%)                            | +25/74<br>(+34%)                                                    |      |
|                                                  |    | <b>p&lt;0.0001*</b>     | <b>p&lt;0.0001*</b><br>p=0.868 <sup>†</sup> | <b>p&lt;0.0001*</b><br>p=0.740 <sup>‡</sup><br>p=0.868 <sup>‡</sup> |      | <b>p&lt;0.0001*</b>    | <b>p&lt;0.0001*</b><br>p=0.904 <sup>†</sup> | <b>p&lt;0.0001*</b><br>p<0.999 <sup>†</sup><br>p=0.904 <sup>‡</sup> |      |
| <b><i>Overall (across all three species)</i></b> |    | -32.5%<br>(-30% to 43%) |                                             |                                                                     |      | +57%<br>(+41% to +78%) |                                             |                                                                     |      |

\*=vs. Untreated CFUs, <sup>†</sup>=vs. *IFIT1*, <sup>‡</sup>=vs. *IFIT2*, <sup>§</sup>=vs. *IFIT3*

Abbreviations: BCG= Bacillus Calmette–Guérin, CFUs= colony forming units, *IFITs*= interferon-induced protein with tetratricopeptide repeats

**Supplementary Table 3:** Mycobacterial species and plasmids used for the *in vitro* knock-up and knock-down of *IFITs* in the study.

|                                                   | Description                                                                            | Source/Reference                                     |
|---------------------------------------------------|----------------------------------------------------------------------------------------|------------------------------------------------------|
| <b><i>M. tb</i> species</b>                       |                                                                                        |                                                      |
| <i>M. smegmatis</i>                               | <i>M. smegmatis</i> MC155                                                              | Laboratory collection (Harper <i>et al.</i> , 2010)  |
| <i>M. bovis</i> BCG                               | <i>M. bovis</i> BCG strain Pasteur 1743P2                                              | Laboratory collection (Viljoen <i>et al.</i> , 2013) |
| <i>M. tb</i> R179                                 | Beijing genotype strain R220                                                           | Clinical isolate (Johnson <i>et al.</i> , 2006)      |
| <i>E. coli</i> DH5 $\alpha$                       | ATCC53868                                                                              | Laboratory collection                                |
| <b>Plasmid for overexpression (knock-up)</b>      |                                                                                        |                                                      |
| pcDNA3.1 3xFlag <i>IFIT1</i>                      | Mammalian expression vector with human <i>IFIT1</i> as an insert and without mutations | (Katibah <i>et al.</i> , 2013)                       |
| pcDNA3.1 3xFlag <i>IFIT2</i>                      | Mammalian expression vector with human <i>IFIT2</i> as an insert without mutations     | (Katibah <i>et al.</i> , 2013)                       |
| pcDNA3.1 3xFlag <i>IFIT3</i>                      | Mammalian expression vector with human <i>IFIT3</i> as an insert without mutations     | (Katibah <i>et al.</i> , 2013)                       |
| <b>siRNA pre-mix of <i>IFITs</i> (knock-down)</b> |                                                                                        |                                                      |
| siRNA Premix                                      | Target Sequence (5' to 3')                                                             | Catalogue Number (length)                            |
| <i>Hs-IFIT1</i>                                   | CAGGCTGTCCGCTTAAATCCA                                                                  | Catalogue no. S100445879 (4396 bp)                   |
| <i>Hs-IFIT1</i>                                   | TACATGGGAGTTATCCATTGA                                                                  | Catalogue no. S103224284 (4396 bp)                   |
| <i>Hs-IFIT2</i>                                   | AAAGAAAGTTACTGGA ACTAA                                                                 | Catalogue no. S104145372 (3505 bp)                   |
| <i>Hs-IFIT2</i>                                   | CCCATAGAGGTTAGTCCTGCA                                                                  | Catalogue no. S104259010 (3505 bp)                   |
| <i>Hs-IFIT3</i>                                   | ATGCTATGGACTATTCGAATA                                                                  | Catalogue no. S103152737 (2467 bp)                   |
| <i>Hs-IFIT3</i>                                   | AGAGATGATTGAAGCACTAAA                                                                  | Catalogue no. S104197788 (2467 bp)                   |

*Abbreviations:* BCG= Bacillus Calmette–Guérin, *E. coli*= Escherichia coli, *IFIT*= interferon-induced protein with tetratricopeptide.

**Supplementary Table 4:** Cytokines expression (pg/ml) 12 hours post *M. smegmatis* infection†. Compared to *M. smegmatis* infected THP-1 cells without intervention, we observed significantly lower level of cytokines after knock-down and higher level after knock-up of *IFITs*. For knock-down, levels of IFN- $\alpha$ , IFN- $\beta$ , IL-1 $\alpha$ , IL-4 and IL-12p70 were found to be similar. Also, for knock-up, levels of IL-1 $\alpha$ , IL-1 $\beta$  and TNF- $\alpha$  were found to be similar. Data presented as mean  $\pm$  S.D.

| Cytokines                      | Uninfected     | <i>M. smegmatis</i>                   | Knock-down (siRNA)                                        |                                                           |                                                          | Knock-up (vector-based over-expression)                        |                                                                 |                                                                |
|--------------------------------|----------------|---------------------------------------|-----------------------------------------------------------|-----------------------------------------------------------|----------------------------------------------------------|----------------------------------------------------------------|-----------------------------------------------------------------|----------------------------------------------------------------|
|                                |                |                                       | <i>IFIT1</i>                                              | <i>IFIT2</i>                                              | <i>IFIT3</i>                                             | <i>IFIT1</i>                                                   | <i>IFIT2</i>                                                    | <i>IFIT3</i>                                                   |
| <i>at 12 hours</i>             |                |                                       |                                                           |                                                           |                                                          |                                                                |                                                                 |                                                                |
| <b>IDO-1</b>                   | 971 $\pm$ 13.4 | 1550.3 $\pm$ 16.4<br><b>p =0.047*</b> | 0.3 $\pm$ 0.5<br><b>p&lt;0.001*</b><br><b>p&lt;0.001†</b> | 8.6 $\pm$ 1.5<br><b>p&lt;0.001*</b><br><b>p&lt;0.001†</b> | 9 $\pm$ 1<br><b>p&lt;0.001*</b><br><b>p&lt;0.001†</b>    | 1864.3 $\pm$ 5.8<br><b>p=0.001*</b><br><b>p=0.708†</b>         | 2343 $\pm$ 7.5<br><b>p&lt;0.001*</b><br><b>p=0.001†</b>         | 2865 $\pm$ 9.8<br><b>p&lt;0.001*</b><br><b>p&lt;0.001†</b>     |
| <b>IFN-<math>\alpha</math></b> | 29 $\pm$ 1     | 82 $\pm$ 6.2<br><b>p&gt;0.999*</b>    | 0.3 $\pm$ 0.5<br><b>p&gt;0.999*</b><br><b>p&gt;0.999†</b> | 6 $\pm$ 1<br><b>p&gt;0.999*</b><br><b>p&gt;0.999†</b>     | 12.5 $\pm$ 2<br><b>p&gt;0.999*</b><br><b>p&gt;0.999†</b> | 1085 $\pm$ 9.8<br><b>p=0.001*</b><br><b>p=0.003†</b>           | 1255.6 $\pm$ 9.4<br><b>p=0.044*</b><br><b>p=0.001†</b>          | 984.6 $\pm$ 15.6<br><b>p&lt;0.001*</b><br><b>p&lt;0.001†</b>   |
| <b>IFN-<math>\beta</math></b>  | 0              | 0<br><b>p&gt;0.999*</b>               | 0<br><b>p&gt;0.999*</b><br><b>p&gt;0.999†</b>             | 0<br><b>p&gt;0.999*</b><br><b>p&gt;0.999†</b>             | 0<br><b>p&gt;0.999*</b><br><b>p&gt;0.999†</b>            | 635 $\pm$ 12.5<br><b>p&lt;0.001*</b><br><b>p&lt;0.001†</b>     | 414.6 $\pm$ 8.5<br><b>p&lt;0.001*</b><br><b>p&lt;0.001†</b>     | 488.3 $\pm$ 8<br><b>p&lt;0.001*</b><br><b>p&lt;0.001†</b>      |
| <b>IFN-<math>\gamma</math></b> | 527.3 $\pm$ 12 | 1361 $\pm$ 7.5<br><b>p=0.0004*</b>    | 0<br><b>p=0.101*</b><br><b>p&lt;0.001†</b>                | 0<br><b>p=0.101*</b><br><b>p&lt;0.001†</b>                | 0<br><b>p=0.101*</b><br><b>p&lt;0.001†</b>               | 7599 $\pm$ 946.8<br><b>p&lt;0.001*</b><br><b>p&lt;0.001†</b>   | 7405.3 $\pm$ 1029.2<br><b>p&lt;0.001*</b><br><b>p&lt;0.001†</b> | 7670 $\pm$ 908.8<br><b>p&lt;0.001*</b><br><b>p&lt;0.001†</b>   |
| <b>IL-4</b>                    | 7.6 $\pm$ 4.7  | 487.3 $\pm$ 9.6<br><b>p&lt;0.001*</b> | 0<br><b>p&gt;0.999*</b><br><b>p=0.016†</b>                | 0.3 $\pm$ 0.5<br><b>p&gt;0.999*</b><br><b>p=0.017†</b>    | 2.3 $\pm$ 2.5<br><b>p&gt;0.999*</b><br><b>p=0.017†</b>   | 5164.3 $\pm$ 179.8<br><b>p&lt;0.001*</b><br><b>p&lt;0.001†</b> | 5134.3 $\pm$ 305.1<br><b>p&lt;0.001*</b><br><b>p&lt;0.001†</b>  | 4954.6 $\pm$ 492.2<br><b>p&lt;0.001*</b><br><b>p&lt;0.001†</b> |

\*vs. Uninfected, †vs. *M. smegmatis*



|                 |              |                                       |                                                         |                                                 |                                                       |                                                              |                                                              |                                                              |
|-----------------|--------------|---------------------------------------|---------------------------------------------------------|-------------------------------------------------|-------------------------------------------------------|--------------------------------------------------------------|--------------------------------------------------------------|--------------------------------------------------------------|
| <b>IL-6</b>     | 239.3 ± 19.8 | 1983.6 ± 4<br><b>p&lt;0.001</b> *     | 0.6 ± 0.5<br>p=0.909*<br><b>p&lt;0.001</b> †            | 9 ± 8.1<br>p=0.924*<br><b>p&lt;0.001</b> †      | 0.6 ± 1.1<br>p=0.909*<br><b>p&lt;0.001</b> †          | 3530.6 ± 467.3<br><b>p&lt;0.001</b> *<br><b>p&lt;0.001</b> † | 3567.3 ± 216.7<br><b>p&lt;0.001</b> *<br><b>p&lt;0.001</b> † | 2921 ± 84.1<br><b>p&lt;0.001</b> *<br><b>p&lt;0.001</b> †    |
| <b>IL-8</b>     | 657 ± 19.6   | 9442.6 ± 489.8<br><b>p&lt;0.001</b> * | 1300.6 ± 3<br><b>p= 0.016</b> *<br><b>p&lt;0.002</b> †  | 676.3 ± 19.8<br>p=0.999*<br><b>p=0.001</b> †    | 991.6 ± 38.2<br>p=0.635*<br><b>p&lt;0.001</b> †       | 8680.6 ± 84.5<br><b>p&lt;0.001</b> *<br><b>p= 0.002</b> †    | 8932.6 ± 52.5<br><b>p&lt;0.001</b> *<br>p=0.125†             | 7451.6 ± 797.8<br><b>p&lt;0.001</b> *<br><b>p&lt;0.001</b> † |
| <b>IL-12p40</b> | 94.6 ± 6.6   | 753.6 ± 9.7<br>p=0.013*               | 3.6 ± 3.2<br>p=0.999*<br><b>p= 0.002</b> †              | 9.3 ± 4.5<br>p=0.924*<br><b>p=0.003</b> †       | 0<br>p=0.999*<br><b>p=0.002</b> †                     | 3421.6 ± 477.3<br><b>p&lt;0.001</b> *<br><b>p&lt;0.001</b> † | 2591 ± 360.2<br><b>p&lt;0.001</b> *<br><b>p&lt;0.001</b> †   | 3828 ± 164.8<br><b>p&lt;0.001</b> *<br><b>p&lt;0.001</b> †   |
| <b>IL-12p70</b> | 16.6 ± 4.1   | 406.3 ± 14.7<br>p=0.437*              | 0.3 ± 0.5<br>p>0.999*<br><b>p=0.038</b> †               | 0<br>p>0.999*<br><b>p=0.038</b> †               | 0<br>p>0.999*<br><b>p=0.038</b> †                     | 561.6 ± 8.7<br>p=0.078*<br>p= 0.991†                         | 844.6 ± 32<br><b>p=0.001</b> *<br>p= 0.283†                  | 767.6 ± 32.6<br><b>p=0.002</b> *<br>p=0.539†                 |
| <b>IL-23</b>    | 1245 ± 52.7  | 2069.6 ± 122.9<br><b>p=0.001</b> *    | 0.6 ± 1.1<br><b>p&lt;0.001</b> *<br><b>p&lt;0.001</b> † | 0<br><b>p&lt;0.001</b> *<br><b>p&lt;0.001</b> † | 2 ± 3.4<br><b>p&lt;0.001</b> *<br><b>p&lt;0.001</b> † | 4599.3 ± 510.1<br><b>p&lt;0.001</b> *<br><b>p&lt;0.001</b> † | 4547.3 ± 253.6<br><b>p&lt;0.001</b> *<br><b>p&lt;0.001</b> † | 3207.3 ± 179.4<br><b>p&lt;0.001</b> *<br><b>p&lt;0.001</b> † |

\*vs. Uninfected, †vs. *M. smegmatis*

|                                |                 |                                     |                                                        |                                                       |                                                       |                                                                             |                                                                            |                                                                             |
|--------------------------------|-----------------|-------------------------------------|--------------------------------------------------------|-------------------------------------------------------|-------------------------------------------------------|-----------------------------------------------------------------------------|----------------------------------------------------------------------------|-----------------------------------------------------------------------------|
| <b>IL-1<math>\alpha</math></b> | 243.3 $\pm$ 9.4 | 254.3 $\pm$ 40.5<br>p<0.999 *       | 67.3 $\pm$ 3<br>p= 0.982*<br>p= 0.975 <sup>†</sup>     | 74.6 $\pm$ 10.9<br>p=0.986 *<br>p= 0.980 <sup>†</sup> | 75 $\pm$ 8.7<br>p=0.986 *<br>p= 0.980 <sup>†</sup>    | 6932.3 $\pm$ 79<br><b>p&lt;0.001</b> *<br><b>p&lt;0.001</b> <sup>†</sup>    | 5453 $\pm$ 380.7<br><b>p&lt;0.001</b> *<br><b>p&lt;0.001</b> <sup>†</sup>  | 4562.6 $\pm$ 312.5<br><b>p&lt;0.001</b> *<br><b>p&lt;0.001</b> <sup>†</sup> |
| <b>IL-1<math>\beta</math></b>  | 22 $\pm$ 4.3    | 131 $\pm$ 13.1<br><b>p=0.0002</b> * | 8.6 $\pm$ 3.2<br>p=0.982 *<br>p=0.998 <sup>†</sup>     | 7 $\pm$ 2.6<br>p=0.986 *<br>p=0.998 <sup>†</sup>      | 1 $\pm$ 1<br>p=0.986 *<br>p=0.997 <sup>†</sup>        | 1278 $\pm$ 151.6<br><b>p&lt;0.001</b> *<br><b>p&lt;0.001</b> <sup>†</sup>   | 1484.6 $\pm$ 41.7<br><b>p&lt;0.001</b> *<br><b>p&lt;0.001</b> <sup>†</sup> | 1160.6 $\pm$ 165.7<br><b>p&lt;0.001</b> *<br><b>p&lt;0.001</b> <sup>†</sup> |
| <b>TNF-<math>\alpha</math></b> | 30 $\pm$ 5.5    | 634.3 $\pm$ 33.8<br>p=0.032 *       | 139.3 $\pm$ 23.1<br>p= 0.999*<br>p= 0.151 <sup>†</sup> | 264.6 $\pm$ 20.6<br>p= 0.916*<br>p=0.508 <sup>†</sup> | 113.6 $\pm$ 9.5<br>p<0.999 *<br>p= 0.109 <sup>†</sup> | 4456.6 $\pm$ 318.1<br><b>p&lt;0.001</b> *<br><b>p&lt;0.001</b> <sup>†</sup> | 6202 $\pm$ 168.3<br><b>p&lt;0.001</b> *<br><b>p&lt;0.001</b> <sup>†</sup>  | 4154.6 $\pm$ 123.1<br><b>p&lt;0.001</b> *<br><b>p&lt;0.001</b> <sup>†</sup> |

\*vs. Uninfected, <sup>†</sup>vs. *M. smegmatis*

Abbreviations: IDO, indoleamine 2,3-dioxygenase; IFI, interferon-induced protein; IFIT, interferon-induced protein with tetratricopeptide; IFN, interferon gamma; IL, interleukin; ISG, interferon-stimulated gene

**Supplementary Table 5:** Cytokine expression (pg/ml) after 12 and 96 hours of *M. bovis* BCG infection. Compared to BCG infected THP-1 cells without intervention, we observed higher levels of cytokines for knock-down and knock-up of *IFITs*. The level of most of the cytokines increases significantly after knock-up of *IFITs*. For knock-down, levels of IFN- $\alpha$ , IFN- $\beta$ , IL-4 and IL-12p70 were found to be similar. Also, for knock-up, levels of IL-1 $\alpha$ , IL-1 $\beta$  and TNF- $\alpha$  were found to be similar. Data presented as mean  $\pm$  S.D

| Cytokines                      | Uninfected     | <i>M. bovis</i> BCG            | Knock-down (siRNA)                    |                                       |                                       | Knock-up (vector-based over-expression)    |                                            |                                            |
|--------------------------------|----------------|--------------------------------|---------------------------------------|---------------------------------------|---------------------------------------|--------------------------------------------|--------------------------------------------|--------------------------------------------|
|                                |                |                                | <i>IFIT1</i>                          | <i>IFIT2</i>                          | <i>IFIT3</i>                          | <i>IFIT1</i>                               | <i>IFIT2</i>                               | <i>IFIT3</i>                               |
| <i>at 12 hours</i>             |                |                                |                                       |                                       |                                       |                                            |                                            |                                            |
| <b>IDO-1</b>                   | 971 $\pm$ 13.4 | 1489.3 $\pm$ 112.2<br>p=0.073* | 0.3 $\pm$ 0.5<br>p<0.001*<br>p<0.001† | 8.6 $\pm$ 1.5<br>p<0.001*<br>p<0.001† | 9 $\pm$ 1<br>p<0.001*<br>p<0.001†     | 3201.3 $\pm$ 86.6<br>p<0.001*<br>p<0.001†  | 3198 $\pm$ 171.4<br>p<0.001*<br>p<0.001†   | 4069.3 $\pm$ 141.9<br>p<0.001*<br>p<0.001† |
| <b>IFN-<math>\alpha</math></b> | 29 $\pm$ 1     | 83.6 $\pm$ 9<br>p>0.999*       | 0.3 $\pm$ 0.5<br>p>0.999*<br>p>0.999† | 6 $\pm$ 1<br>p>0.999*<br>p>0.999†     | 12.6 $\pm$ 2<br>p>0.999*<br>p>0.999†  | 769.6 $\pm$ 28.5<br>p=0.001*<br>p=0.003†   | 579.6 $\pm$ 36.1<br>p=0.044*<br>p=0.101†   | 872 $\pm$ 103.7<br>p<0.001*<br>p=0.0004†   |
| <b>IFN-<math>\beta</math></b>  | 0              | 0<br>p>0.999*                  | 0<br>p>0.999*<br>p>0.999†             | 0<br>p>0.999*<br>p>0.999†             | 0<br>p>0.999*<br>p>0.999†             | 8225.6 $\pm$ 413.2<br>p<0.001*<br>p<0.001† | 5366.3 $\pm$ 304<br>p<0.001*<br>p<0.001†   | 6498.6 $\pm$ 160.9<br>p<0.001*<br>p<0.001† |
| <b>IFN-<math>\gamma</math></b> | 527.3 $\pm$ 12 | 1691 $\pm$ 84.7<br>p<0.001*    | 0<br>p=0.064*<br>p<0.001†             | 0<br>p=0.064*<br>p<0.001†             | 0<br>p=0.064*<br>p<0.001†             | 6937.3 $\pm$ 369.8<br>p<0.001*<br>p<0.001† | 8228.3 $\pm$ 404.2<br>p<0.001*<br>p<0.001† | 6273.3 $\pm$ 370.5<br>p<0.001*<br>p<0.001† |
| <b>IL-4</b>                    | 7.6 $\pm$ 4.7  | 829 $\pm$ 31.9<br>p=0.0002*    | 0<br>p>0.999*<br>p<0.001†             | 0.3 $\pm$ 0.5<br>p>0.999*<br>p<0.001† | 2.3 $\pm$ 2.5<br>p>0.999*<br>p<0.001† | 5797.6 $\pm$ 810.4<br>p<0.001*<br>p<0.001† | 5019.6 $\pm$ 290.5<br>p<0.001*<br>p<0.001† | 4559.6 $\pm$ 252.1<br>p<0.001*<br>p<0.001† |

\*vs. Uninfected, †vs. *M. bovis* BCG

|                 |              |                                    |                                                            |                                                          |                                                           |                                                            |                                                            |                                                            |
|-----------------|--------------|------------------------------------|------------------------------------------------------------|----------------------------------------------------------|-----------------------------------------------------------|------------------------------------------------------------|------------------------------------------------------------|------------------------------------------------------------|
| <b>IL-6</b>     | 239.3 ± 19.8 | 2376 ± 319<br><b>p&lt;0.001*</b>   | 0.6 ± 0.5<br>p=0.880*<br><b>p&lt;0.001†</b>                | 9 ± 8.1<br>p=0.898*<br><b>p&lt;0.001†</b>                | 0.6 ± 1.1<br>p=0.880*<br><b>p&lt;0.001†</b>               | 9253.3 ± 378.3<br><b>p&lt;0.001*</b><br><b>p&lt;0.001†</b> | 6491 ± 157.4<br><b>p&lt;0.001*</b><br><b>p&lt;0.001†</b>   | 8353.6 ± 225.3<br><b>p&lt;0.001*</b><br><b>p&lt;0.001†</b> |
| <b>IL-8</b>     | 657 ± 19.6   | 9113 ± 572<br><b>p&lt;0.001*</b>   | 1854.6 ± 127.1<br><b>p&lt;0.001*</b><br><b>p&lt;0.001†</b> | 1106.6 ± 72.5<br>p=0.186*<br><b>p&lt;0.001†</b>          | 1799.3 ± 56.5<br><b>p&lt;0.001*</b><br><b>p&lt;0.001†</b> | 8328 ± 616.3<br><b>p&lt;0.001*</b><br><b>p&lt;0.001†</b>   | 8526 ± 677.8<br><b>p&lt;0.001*</b><br><b>p=0.024†</b>      | 7928 ± 54.5<br><b>p&lt;0.001*</b><br><b>p&lt;0.001†</b>    |
| <b>IL-12p40</b> | 94.6 ± 6.6   | 493.6 ± 60<br>p=0.327*             | 3.6 ± 3.2<br>p<0.999*<br>p=0.110†                          | 9.3 ± 4.5<br>p<0.999*<br>p=0.110†                        | 0<br>p<0.999*<br>p=0.110†                                 | 3241.3 ± 652.6<br><b>p&lt;0.001*</b><br><b>p&lt;0.001†</b> | 2480 ± 419.2<br><b>p&lt;0.001*</b><br><b>p&lt;0.001†</b>   | 1080.6 ± 61.2<br><b>p&lt;0.001*</b><br>p=0.024†            |
| <b>IL-12p70</b> | 16.6 ± 4.1   | 375.3 ± 59.9<br>p=0.469*           | 0.3 ± 0.5<br>p<0.999*<br>p=0.409†                          | 0<br>p<0.999*<br>p=0.408†                                | 0<br>p<0.999*<br>p=0.408†                                 | 1538.6 ± 26.6<br><b>p&lt;0.001*</b><br><b>p&lt;0.001†</b>  | 1087 ± 17.6<br><b>p&lt;0.001*</b><br><b>p&lt;0.001†</b>    | 1968 ± 195<br><b>p&lt;0.001*</b><br><b>p&lt;0.001†</b>     |
| <b>IL-23</b>    | 1245 ± 52.7  | 2205 ± 213.6<br><b>p&lt;0.001*</b> | 528 ± 102.8<br><b>p=0.002*</b><br><b>p&lt;0.001†</b>       | 147.3 ± 25.5<br><b>p&lt;0.001*</b><br><b>p&lt;0.001†</b> | 376.3 ± 39.4<br><b>p&lt;0.001*</b><br><b>p&lt;0.001†</b>  | 6530 ± 453.2<br><b>p&lt;0.001*</b><br><b>p&lt;0.001†</b>   | 6558 ± 258.9<br><b>p&lt;0.001*</b><br><b>p&lt;0.001†</b>   | 4408.6 ± 495.2<br><b>p&lt;0.001*</b><br><b>p&lt;0.001†</b> |
| <b>IL-1α</b>    | 243.3 ± 9.4  | 254.6 ± 40.5<br>p>0.999*           | 72.6 ± 11.7<br>p=0.979*<br>p=0.970†                        | 67.6 ± 21.1<br>p=0.974*<br>p=0.965†                      | 57.3 ± 26.3<br>p=0.966*<br>p=0.953†                       | 786.3 ± 71.2<br>p=0.050*<br>p=0.060†                       | 621.6 ± 95<br>p=0.390*<br>p=0.438†                         | 1139.6 ± 122.5<br><b>p&lt;0.001*</b><br><b>p&lt;0.001†</b> |
| <b>IL-1β</b>    | 22 ± 4.3     | 127 ± 15.6<br>p=0.998*             | 12.3 ± 8.7<br>p>0.999*<br>p=0.998†                         | 12 ± 7.2<br>p>0.999*<br>p=0.998†                         | 2.3 ± 1.5<br>p>0.999*<br>p=0.996†                         | 752.3 ± 33.2<br><b>p=0.001*</b><br><b>p=0.012†</b>         | 743.3 ± 26.8<br><b>p=0.002*</b><br><b>p=0.014†</b>         | 597.3 ± 65.2<br><b>p=0.029*</b><br>p=0.144†                |
| <b>TNF-α</b>    | 30 ± 5.5     | 679.3 ± 103.3<br><b>p=0.007*</b>   | 104 ± 11<br>p>0.999*<br><b>p=0.029†</b>                    | 56.3 ± 16.6<br>p>0.999*<br><b>p=0.012†</b>               | 14 ± 2<br>p>0.999*<br><b>p=0.005†</b>                     | 8295 ± 303.9<br><b>p&lt;0.001*</b><br><b>p&lt;0.001†</b>   | 8200.6 ± 608.7<br><b>p&lt;0.001*</b><br><b>p&lt;0.001†</b> | 6406 ± 168<br><b>p&lt;0.001*</b><br><b>p&lt;0.001†</b>     |

\*vs. Uninfected, †vs. *M. bovis* BCG

| Cytokines          | Uninfected | <i>M. bovis</i> BCG       | Knock-down (siRNA)                |                                   |                                   | Knock-up (vector-based over-expression) |                                        |                                        |
|--------------------|------------|---------------------------|-----------------------------------|-----------------------------------|-----------------------------------|-----------------------------------------|----------------------------------------|----------------------------------------|
|                    |            |                           | <i>IFIT1</i>                      | <i>IFIT2</i>                      | <i>IFIT3</i>                      | <i>IFIT1</i>                            | <i>IFIT2</i>                           | <i>IFIT3</i>                           |
| <i>at 96 hours</i> |            |                           |                                   |                                   |                                   |                                         |                                        |                                        |
| <b>IDO-1</b>       | 971 ± 13.4 | 1504.3 ± 86.5<br>p=0.112* | 0.3 ± 0.5<br>p<0.001*<br>p<0.001† | 8.6 ± 1.5<br>p<0.001*<br>p<0.001† | 9 ± 1<br>p<0.001*<br>p<0.001†     | 2525.3 ± 346.7<br>p<0.001*<br>p<0.001†  | 1236.6 ± 185.1<br>p=0.869*<br>p=0.864† | 2724 ± 249<br>p<0.001*<br>p<0.001†     |
| <b>IFN-α</b>       | 29 ± 1     | 74 ± 7.9<br>p>0.999*      | 0.3 ± 0.5<br>p>0.999*<br>p>0.999† | 6 ± 1<br>p>0.999*<br>p>0.999†     | 12.6 ± 2<br>p>0.999*<br>p>0.999†  | 534 ± 74<br>p=0.158*<br>p=0.258†        | 131.6 ± 9<br>p=0.995*<br>p>0.999†      | 664.6 ± 34<br>p=0.026*<br>p=0.052†     |
| <b>IFN-β</b>       | 0          | 0<br>p>0.999*             | 0<br>p>0.999*<br>p>0.999†         | 0<br>p>0.999*<br>p>0.999†         | 0<br>p>0.999*<br>p>0.999†         | 6310.3 ± 248.4<br>p<0.001*<br>p<0.001†  | 5512.6 ± 101<br>p<0.001*<br>p<0.001†   | 4534 ± 365.8<br>p<0.001*<br>p<0.001†   |
| <b>IFN-γ</b>       | 527.3 ± 12 | 964.3 ± 30<br>p=0.322*    | 0<br>p=0.121*<br>p<0.001†         | 0<br>p=0.121*<br>p<0.001†         | 0<br>p=0.121*<br>p<0.001†         | 5936.3 ± 635.3<br>p<0.001*<br>p<0.001†  | 8237.3 ± 459.7<br>p<0.001*<br>p<0.001† | 7457.6 ± 298.2<br>p<0.001*<br>p<0.001† |
| <b>IL-4</b>        | 7.6 ± 4.7  | 492 ± 13.4<br>p=0.200*    | 0<br>p>0.999*<br>p=0.184†         | 0.3 ± 0.5<br>p>0.999*<br>p=0.184† | 2.3 ± 2.5<br>p>0.999*<br>p=0.188† | 4410.3 ± 177.9<br>p<0.001*<br>p<0.001†  | 4216 ± 102.8<br>p<0.001*<br>p<0.001†   | 3453.6 ± 366.5<br>p<0.001*<br>p<0.001† |

\*vs. Uninfected, †vs. *M. bovis* BCG

|                 |              |                                      |                                                  |                                                            |                                                       |                                                             |                                                            |                                                            |
|-----------------|--------------|--------------------------------------|--------------------------------------------------|------------------------------------------------------------|-------------------------------------------------------|-------------------------------------------------------------|------------------------------------------------------------|------------------------------------------------------------|
| <b>IL-6</b>     | 239.3 ± 19.8 | 2347.6 ± 315.4<br><b>p&lt;0.001*</b> | 0.6 ± 0.5<br>p=0.921*<br><b>p&lt;0.001†</b>      | 9 ± 8.1<br>p=0.934*<br><b>p&lt;0.001†</b>                  | 0.6 ± 1.1<br>p=0.921*<br><b>p&lt;0.001†</b>           | 6586 ± 492.9<br><b>p&lt;0.001*</b><br><b>p&lt;0.001†</b>    | 7373.3 ± 163.5<br><b>p&lt;0.001*</b><br><b>p&lt;0.001†</b> | 4651 ± 385.9<br><b>p&lt;0.001*</b><br><b>p&lt;0.001†</b>   |
| <b>IL-8</b>     | 657 ± 19.6   | 9296.6 ± 445.6<br><b>p&lt;0.001*</b> | 1208.3 ± 160.5<br>p=0.089*<br><b>p&lt;0.001†</b> | 1479.3 ± 153.8<br><b>p&lt;0.001*</b><br><b>p&lt;0.001†</b> | 979.6 ± 20.9<br>p=0.708*<br><b>p&lt;0.001†</b>        | 3270.6 ± 1025.6<br><b>p&lt;0.001*</b><br><b>p&lt;0.001†</b> | 2677 ± 417.2<br><b>p&lt;0.001*</b><br><b>p&lt;0.001†</b>   | 2662.3 ± 263.8<br><b>p&lt;0.001*</b><br><b>p&lt;0.001†</b> |
| <b>IL-12p40</b> | 94.6 ± 6.6   | 589.6 ± 59<br>p=0.178*               | 3.6 ± 3.2<br>p>0.999*<br>p=0.055†                | 9.3 ± 4.5<br>p>0.999*<br>p=0.059†                          | 0<br>p>0.999*<br>p=0.052†                             | 1355 ± 527.6<br><b>p&lt;0.001*</b><br><b>p=0.003†</b>       | 2553.3 ± 370.2<br><b>p&lt;0.001*</b><br><b>p&lt;0.001†</b> | 2358.3 ± 433.3<br><b>p&lt;0.001*</b><br><b>p&lt;0.001†</b> |
| <b>IL-12p70</b> | 16.6 ± 4.1   | 23.6 ± 1.1<br>p>0.999*               | 0<br>p>0.999*<br>p>0.999†                        | 0.3 ± 0.5<br>p>0.999*<br>p>0.999†                          | 0<br>p>0.999*<br>p>0.999†                             | 1448 ± 264.7<br><b>p&lt;0.001*</b><br><b>p&lt;0.001†</b>    | 1873.6 ± 126.1<br><b>p&lt;0.001*</b><br><b>p&lt;0.001†</b> | 2923 ± 346.1<br><b>p&lt;0.001*</b><br><b>p&lt;0.001†</b>   |
| <b>IL-23</b>    | 1245 ± 52.7  | 1077.6 ± 49.6<br>p=0.989*            | 407.3 ± 12<br><b>p=0.001*</b><br><b>p=0.015†</b> | 410.3 ± 13.5<br><b>p=0.001*</b><br><b>p=0.016†</b>         | 231.6 ± 46.1<br><b>p&lt;0.001*</b><br><b>p=0.001†</b> | 5143 ± 409.8<br><b>p&lt;0.001*</b><br><b>p&lt;0.001†</b>    | 4478 ± 251.8<br><b>p&lt;0.001*</b><br><b>p&lt;0.001†</b>   | 4507 ± 319.5<br><b>p&lt;0.001*</b><br><b>p&lt;0.001†</b>   |
| <b>IL-1α</b>    | 243.3 ± 9.4  | 262.6 ± 42.8<br>p>0.999*             | 14.6 ± 3<br>p=0.936*<br>p=0.904†                 | 14.3 ± 3<br>p=0.936*<br>p=0.904†                           | 38.3 ± 3<br>p=0.964*<br>p=0.942†                      | 732.6 ± 112.4<br>p=0.189*<br>p=0.233†                       | 551.6 ± 112.3<br>p=0.754*<br>p=0.810†                      | 469.3 ± 45.4<br>p=0.940*<br>p=0.963†                       |

\*vs. Uninfected, †vs. *M. bovis* BCG

|                                |              |                              |                                                     |                                                     |                                                  |                                                                           |                                                                         |                                                                           |
|--------------------------------|--------------|------------------------------|-----------------------------------------------------|-----------------------------------------------------|--------------------------------------------------|---------------------------------------------------------------------------|-------------------------------------------------------------------------|---------------------------------------------------------------------------|
| <b>IL-1<math>\beta</math></b>  | 22 $\pm$ 4.3 | 125.3 $\pm$ 17.3<br>p>0.999* | 8.6 $\pm$ 3.2<br>p>0.999*<br>p=0.998 <sup>†</sup>   | 7 $\pm$ 2.6<br>p>0.999*<br>p=0.998 <sup>†</sup>     | 1 $\pm$ 1<br>p>0.999*<br>p=0.998 <sup>†</sup>    | 456 $\pm$ 16<br>p=0.331*<br>p=0.682 <sup>†</sup>                          | 504.3 $\pm$ 32.1<br>p=0.204*<br>p=0.513 <sup>†</sup>                    | 833 $\pm$ 96.3<br><b>p=0.001*</b><br><b>p=0.010<sup>†</sup></b>           |
| <b>TNF-<math>\alpha</math></b> | 30 $\pm$ 5.5 | 352.6 $\pm$ 40.7<br>p=0.708* | 54.3 $\pm$ 11.5<br>p>0.999*<br>p=0.784 <sup>†</sup> | 52.3 $\pm$ 18.7<br>p>0.999*<br>p=0.778 <sup>†</sup> | 21 $\pm$ 6.2<br>p>0.999*<br>p=0.679 <sup>†</sup> | 4875.6 $\pm$ 969.5<br><b>p&lt;0.001*</b><br><b>p&lt;0.001<sup>†</sup></b> | 5929 $\pm$ 477.6<br><b>p&lt;0.001*</b><br><b>p&lt;0.001<sup>†</sup></b> | 3955.6 $\pm$ 312.9<br><b>p&lt;0.001*</b><br><b>p&lt;0.001<sup>†</sup></b> |

\*vs. Uninfected, <sup>†</sup>vs. *M. bovis* BCG

**Supplementary Table 6.** Cytokines expression (pg/ml) after 12 and 70 hours of *M. tb* R179 infection of TH1+T cells. The levels of IDO-1, IFN- $\beta$ , IFN- $\gamma$ , IL-4, IL-6, IL-8, IL-12p40, IL-12p70, IL-23 and TNF- $\alpha$  were found to be significantly higher after knock-up of IFITs. Although, the levels of IL-1 $\alpha$ , IL-1 $\beta$  and IFN- $\alpha$  were found to be similar after knock-up of IFITs. After knock-down of IFITs, levels of IDO-1, INF- $\gamma$ , IL-6, IL-8, IL-12p70, IL-23 and TNF- $\alpha$  were found to be significantly reduced. The levels of IL-1 $\alpha$ , IL-1 $\beta$ , IL-4, IL-12p40, IFN- $\alpha$  and INF- $\beta$  were found to be similar before and after knock-down of IFITs. Data presented as mean  $\pm$  S.D.

| Cytokines                      | Uninfected       | <i>M. tb</i> R179              | Knock-down (siRNA)                    |                                           |                                            | Knock-up (vector-based over-expression)    |                                            |                                             |
|--------------------------------|------------------|--------------------------------|---------------------------------------|-------------------------------------------|--------------------------------------------|--------------------------------------------|--------------------------------------------|---------------------------------------------|
|                                |                  |                                | <i>IFIT1</i>                          | <i>IFIT2</i>                              | <i>IFIT3</i>                               | <i>IFIT1</i>                               | <i>IFIT2</i>                               | <i>IFIT3</i>                                |
| <i>at 12 hours</i>             |                  |                                |                                       |                                           |                                            |                                            |                                            |                                             |
| <b>IDO-1</b>                   | 971 $\pm$ 13.4   | 1338.8 $\pm$ 30<br>p=0.902*    | 0.3 $\pm$ 0.5<br>p=0.017*<br>p<0.001† | 8.6 $\pm$ 1.5<br>p=0.019*<br>p<0.001†     | 9 $\pm$ 1<br>p=0.019*<br>p<0.001†          | 2849.3 $\pm$ 562.2<br>p<0.001*<br>p<0.001† | 3148.6 $\pm$ 87.6<br>p<0.001*<br>p<0.001†  | 3693.6 $\pm$ 511.2<br>p<0.001*<br>p<0.001†  |
| <b>IFN-<math>\alpha</math></b> | 29 $\pm$ 1       | 77.3 $\pm$ 2.5<br>p>0.999*     | 0.3 $\pm$ 0.5<br>p>0.999*<br>p>0.999† | 6 $\pm$ 1<br>p>0.999*<br>p>0.999†         | 12.6 $\pm$ 2<br>p>0.999*<br>p>0.999†       | 739.3 $\pm$ 64.6<br>p=0.206*<br>p=0.287†   | 574.3 $\pm$ 40.5<br>p=0.544*<br>p=0.659†   | 836.3 $\pm$ 114.3<br>p=0.093*<br>p=0.141†   |
| <b>IFN-<math>\beta</math></b>  | 0                | 0<br>p>0.999*                  | 0<br>p>0.999*<br>p>0.999†             | 0<br>p>0.999*<br>p>0.999†                 | 0<br>p>0.999*<br>p>0.999†                  | 8143.6 $\pm$ 271.5<br>p<0.001*<br>p<0.001† | 5759.6 $\pm$ 781.3<br>p<0.001*<br>p<0.001† | 6483.6 $\pm$ 158.5<br>p<0.001*<br>p<0.001†  |
| <b>IFN-<math>\gamma</math></b> | 527.3 $\pm$ 12   | 927.3 $\pm$ 84<br>p=0.855*     | 0<br>p=0.587*<br>p=0.028†             | 0<br>p=0.587*<br>p=0.028†                 | 0<br>p=0.587*<br>p=0.028†                  | 7077.3 $\pm$ 583<br>p<0.001*<br>p<0.001†   | 7868.3 $\pm$ 221.9<br>p<0.001*<br>p<0.001† | 7563.3 $\pm$ 1206.4<br>p<0.001*<br>p<0.001† |
| <b>IL-4</b>                    | 7.6 $\pm$ 4.7    | 800 $\pm$ 50.8<br>p=0.106*     | 0<br>p>0.999*<br>p=0.099†             | 0.3 $\pm$ 0.5<br>p>0.999*<br>p=0.099†     | 2.3 $\pm$ 2.5<br>p>0.999*<br>p=0.102†      | 5379.6 $\pm$ 143.6<br>p<0.001*<br>p<0.001† | 8436.3 $\pm$ 453.5<br>p<0.001*<br>p<0.001† | 4521.3 $\pm$ 285.2<br>p<0.001*<br>p<0.001†  |
| <b>IL-6</b>                    | 239.3 $\pm$ 19.8 | 918 $\pm$ 19.6<br>p=0.257*     | 0.6 $\pm$ 0.5<br>p=0.990*<br>p=0.032† | 9 $\pm$ 8.1<br>p=0.992*<br>p=0.032†       | 0.6 $\pm$ 1.1<br>p=0.992*<br>p=0.035†      | 6532.6 $\pm$ 470.2<br>p<0.001*<br>p<0.001† | 5303.3 $\pm$ 329.7<br>p<0.001*<br>p<0.001† | 7818.3 $\pm$ 291.9<br>p<0.001*<br>p<0.001†  |
| <b>IL-8</b>                    | 657 $\pm$ 19.6   | 8822.3 $\pm$ 972.2<br>p<0.001* | 794 $\pm$ 32<br>p>0.999*<br>p<0.001†  | 1066.3 $\pm$ 74.1<br>p=0.804*<br>p<0.001† | 1664.6 $\pm$ 187.3<br>p=0.012*<br>p<0.001† | 6573.6 $\pm$ 204.5<br>p<0.001*<br>p<0.001† | 6886.6 $\pm$ 50.6<br>p<0.001*<br>p<0.001†  | 2778.6 $\pm$ 2096.4<br>p<0.001*<br>p<0.001† |

\*vs. Uninfected, †vs. *M. tb* R179



|                 |             |                                  |                                                       |                                                       |                                                     |                                                            |                                                            |                                                            |
|-----------------|-------------|----------------------------------|-------------------------------------------------------|-------------------------------------------------------|-----------------------------------------------------|------------------------------------------------------------|------------------------------------------------------------|------------------------------------------------------------|
| <b>IL-12p40</b> | 94.6 ± 6.6  | 245 ± 13.5<br>p>0.999*           | 3.6 ± 3.2<br>p>0.999*<br>p=0.990†                     | 9.3 ± 4.5<br>p>0.999*<br>p=0.992†                     | 0<br>p>0.999*<br>p=0.989†                           | 3463.6 ± 458<br><b>p&lt;0.001*</b><br><b>p&lt;0.001†</b>   | 3054.3 ± 858<br><b>p&lt;0.001*</b><br><b>p&lt;0.001†</b>   | 4108 ± 35.5<br><b>p&lt;0.001*</b><br><b>p&lt;0.001†</b>    |
| <b>IL-12p70</b> | 16.6 ± 4.1  | 302.6 ± 17.7<br>p=0.974*         | 0<br>p>0.999*<br><b>p=0.001†</b>                      | 3.3 ± 5.7<br>p>0.999*<br><b>p=0.001†</b>              | 0<br>p>0.999*<br><b>p=0.001†</b>                    | 4589.6 ± 54<br><b>p&lt;0.001*</b><br><b>p&lt;0.001†</b>    | 4112 ± 61.7<br><b>p&lt;0.001*</b><br><b>p&lt;0.001†</b>    | 2766.6 ± 201.6<br><b>p&lt;0.001*</b><br><b>p&lt;0.001†</b> |
| <b>IL-23</b>    | 1245 ± 52.7 | 2009.3 ± 94.4<br>p=0.135*        | 332.3 ± 27.7<br><b>p=0.034*</b><br><b>p&lt;0.001†</b> | 350.6 ± 12.6<br><b>p=0.041*</b><br><b>p&lt;0.001†</b> | 346.3 ± 43<br><b>p=0.039*</b><br><b>p&lt;0.001†</b> | 6610.3 ± 521.1<br><b>p&lt;0.001*</b><br><b>p&lt;0.001†</b> | 7477.6 ± 848.2<br><b>p&lt;0.001*</b><br><b>p&lt;0.001†</b> | 7405 ± 489<br><b>p&lt;0.001*</b><br><b>p&lt;0.001†</b>     |
| <b>IL-1α</b>    | 243.3 ± 9.4 | 249.3 ± 41.4<br>p>0.999*         | 71.3 ± 9.4<br>p=0.998*<br>p=0.998†                    | 68 ± 20.6<br>p=0.999*<br>p=0.998†                     | 77 ± 11.1<br>p>0.999*<br>p=0.945†                   | 702.3 ± 156.7<br>p=0.744*<br>p=0.757†                      | 601.3 ± 90.1<br>p=0.914*<br>p=0.921†                       | 438.6 ± 24.1<br>p=0.997*<br>p=0.998†                       |
| <b>IL-1β</b>    | 22 ± 4.3    | 337.6 ± 23.4<br>p=0.954*         | 39 ± 7.9<br>p>0.999*<br>p=0.966†                      | 66 ± 12<br>p>0.999*<br>p=0.980†                       | 10.3 ± 7.3<br>p>0.999*<br>p=0.945†                  | 757.6 ± 38.2<br>p=0.169*<br>p=0.821†                       | 697 ± 53.8<br>p=0.264*<br>p=0.912†                         | 647 ± 24<br>p=0.362*<br>p=0.959†                           |
| <b>TNF-α</b>    | 30 ± 5.5    | 1222.3 ± 30.7<br><b>p=0.001*</b> | 30.3 ± 4.5<br>p>0.999*<br><b>p=0.001†</b>             | 61 ± 17.5<br>p>0.999*<br><b>p=0.002†</b>              | 17 ± 7<br>p>0.999*<br><b>p=0.001†</b>               | 5956 ± 281.6<br><b>p&lt;0.001*</b><br><b>p&lt;0.001†</b>   | 8084 ± 411.6<br><b>p&lt;0.001*</b><br><b>p&lt;0.001†</b>   | 9036.6 ± 839.7<br><b>p&lt;0.001*</b><br><b>p&lt;0.001†</b> |

\*vs. Uninfected, †vs. *M. tb* R179

| Cytokines          | Uninfected | <i>M. tb</i> R179                 | Knock-down (siRNA)                                    |                                                    |                                                      | Knock-up (vector-based over-expression)                    |                                                            |                                                          |
|--------------------|------------|-----------------------------------|-------------------------------------------------------|----------------------------------------------------|------------------------------------------------------|------------------------------------------------------------|------------------------------------------------------------|----------------------------------------------------------|
|                    |            |                                   | <i>IFIT1</i>                                          | <i>IFIT1</i>                                       | <i>IFIT2</i>                                         | <i>IFIT1</i>                                               | <i>IFIT1</i>                                               | <i>IFIT2</i>                                             |
| <b>at 96 hours</b> |            |                                   |                                                       |                                                    |                                                      |                                                            |                                                            |                                                          |
| <b>IDO-1</b>       | 971 ± 13.4 | 1798 ± 63.6<br><b>p=0.008*</b>    | 0.3 ± 0.5<br><b>p=0.001*</b><br><b>p&lt;0.001†</b>    | 8.6 ± 1.5<br><b>p=0.001*</b><br><b>p&lt;0.001†</b> | 9 ± 1<br><b>p=0.001*</b><br><b>p&lt;0.001†</b>       | 2445.3 ± 368.3<br><b>p&lt;0.001*</b><br><b>p=0.089†</b>    | 2313.6 ± 52.2<br><b>p&lt;0.001*</b><br><b>p=0.316†</b>     | 2680.6 ± 324.5<br><b>p&lt;0.001*</b><br><b>p=0.003†</b>  |
| <b>IFN-α</b>       | 29 ± 1     | 71.3 ± 12.5<br><b>p&gt;0.999*</b> | 0.3 ± 0.5<br><b>p&gt;0.999*</b><br><b>p&gt;0.999†</b> | 6 ± 1<br><b>p&gt;0.999*</b><br><b>p&gt;0.999†</b>  | 12.6 ± 2<br><b>p&gt;0.999*</b><br><b>p&gt;0.999†</b> | 127.3 ± 26<br><b>p&gt;0.999*</b><br><b>p&gt;0.999†</b>     | 275.6 ± 44.2<br><b>p&gt;0.999*</b><br><b>p=0.989†</b>      | 262.6 ± 37<br><b>p&gt;0.999*</b><br><b>p=0.990†</b>      |
| <b>IFN-β</b>       | 0          | 6 ± 3.4<br><b>p&gt;0.999*</b>     | 0<br><b>p&gt;0.999*</b><br><b>p&gt;0.999†</b>         | 12<br><b>p&gt;0.999*</b><br><b>p&gt;0.999†</b>     | 6<br><b>p&gt;0.999*</b><br><b>p&gt;0.999†</b>        | 6347 ± 302<br><b>p&lt;0.001*</b><br><b>p&lt;0.001†</b>     | 5513.3 ± 100.8<br><b>p&lt;0.001*</b><br><b>p&lt;0.001†</b> | 4776 ± 112.2<br><b>p&lt;0.001*</b><br><b>p&lt;0.001†</b> |
| <b>IFN-γ</b>       | 527.3 ± 12 | 1014.6 ± 62.6<br><b>p=0.389*</b>  | 0<br><b>p=0.287*</b><br><b>p&lt;0.001†</b>            | 0<br><b>p=0.287*</b><br><b>p&lt;0.001†</b>         | 0<br><b>p=0.287*</b><br><b>p&lt;0.001†</b>           | 5772 ± 899.6<br><b>p&lt;0.001*</b><br><b>p&lt;0.001†</b>   | 4627.7 ± 522.8<br><b>p&lt;0.001*</b><br><b>p&lt;0.001†</b> | 4709 ± 138.1<br><b>p&lt;0.001*</b><br><b>p&lt;0.001†</b> |
| <b>IL-4</b>        | 7.6 ± 4.7  | 517.6 ± 54.8<br><b>p=0.329*</b>   | 0<br><b>p&gt;0.999*</b><br><b>p=0.310†</b>            | 0.3 ± 0.5<br><b>p&gt;0.999*</b><br><b>p=0.310†</b> | 2.3 ± 2.5<br><b>p&gt;0.999*</b><br><b>p=0.310†</b>   | 4120.6 ± 390.4<br><b>p&lt;0.001*</b><br><b>p&lt;0.001†</b> | 4591 ± 715.7<br><b>p&lt;0.001*</b><br><b>p&lt;0.001†</b>   | 5585 ± 542.5<br><b>p&lt;0.001*</b><br><b>p&lt;0.001†</b> |

\*vs. Uninfected, †vs. *M. tb* R179

|                 |              |                                      |                                                       |                                                    |                                                       |                                                            |                                                            |                                                            |
|-----------------|--------------|--------------------------------------|-------------------------------------------------------|----------------------------------------------------|-------------------------------------------------------|------------------------------------------------------------|------------------------------------------------------------|------------------------------------------------------------|
| <b>IL-6</b>     | 239.3 ± 19.8 | 2347.6 ± 315.4<br><b>p&lt;0.001*</b> | 0.6 ± 0.5<br>p=0.965*<br><b>p&lt;0.001†</b>           | 9 ± 8.1<br>p=0.970*<br><b>p&lt;0.001†</b>          | 0.6 ± 1.1<br>p=0.965*<br><b>p&lt;0.001†</b>           | 6645.6 ± 538.5<br><b>p&lt;0.001*</b><br><b>p&lt;0.001†</b> | 7180.3 ± 480.4<br><b>p&lt;0.001*</b><br><b>p&lt;0.001†</b> | 3915.3 ± 1243<br><b>p&lt;0.001*</b><br><b>p&lt;0.001†</b>  |
| <b>IL-8</b>     | 657 ± 19.6   | 9531.7 ± 572.8<br><b>p&lt;0.001*</b> | 889 ± 161<br>p=0.970*<br><b>p&lt;0.001†</b>           | 548 ± 91.5<br>p>0.999*<br><b>p&lt;0.001†</b>       | 991.7 ± 38.2<br>p=0.821*<br><b>p&lt;0.001†</b>        | 4049 ± 643.8<br><b>p&lt;0.001*</b><br><b>p&lt;0.001†</b>   | 4932.7 ± 52.5<br><b>p&lt;0.001*</b><br><b>p&lt;0.001†</b>  | 4684.3 ± 226.6<br><b>p&lt;0.001*</b><br><b>p&lt;0.001†</b> |
| <b>IL-12p40</b> | 94.7 ± 6.6   | 254.7 ± 11.6<br>p=0.997*             | 3.7 ± 3.2<br>p>0.999*<br>p=0.963†                     | 9.3 ± 4.5<br>p>0.999*<br>p=0.963†                  | 0<br>p>0.999*<br>p=0.963†                             | 2475.7 ± 454.5<br><b>p&lt;0.001*</b><br><b>p&lt;0.001†</b> | 2732 ± 421.9<br><b>p&lt;0.001*</b><br><b>p&lt;0.001†</b>   | 2837.7 ± 820<br><b>p&lt;0.001*</b><br><b>p&lt;0.001†</b>   |
| <b>IL-12p70</b> | 16.7 ± 4.1   | 95.3 ± 7.5<br>p>0.999*               | 0<br>p>0.999*<br>p>0.999†                             | 0.3 ± 0.5<br>p>0.999*<br>p>0.999†                  | 0<br>p>0.999*<br>p>0.999†                             | 3419 ± 153.5<br><b>p&lt;0.001*</b><br><b>p&lt;0.001†</b>   | 3627.7 ± 185.2<br><b>p&lt;0.001*</b><br><b>p&lt;0.001†</b> | 3172.7 ± 725.4<br><b>p&lt;0.001*</b><br><b>p&lt;0.001†</b> |
| <b>IL-23</b>    | 1245 ± 52.7  | 267.7 ± 36.6<br>p=0.993*             | 49 ± 54.5<br><b>p&lt;0.001*</b><br><b>p&lt;0.001†</b> | 34 ± 7<br><b>p&lt;0.001*</b><br><b>p&lt;0.001†</b> | 38.7 ± 40<br><b>p&lt;0.001*</b><br><b>p&lt;0.001†</b> | 724 ± 295.7<br><b>p&lt;0.001*</b><br><b>p&lt;0.001†</b>    | 536.3 ± 329.8<br><b>p&lt;0.001*</b><br><b>p&lt;0.001†</b>  | 528.3 ± 376.6<br><b>p&lt;0.001*</b><br><b>p&lt;0.001†</b>  |
| <b>IL-1α</b>    | 243.3 ± 9.4  | 267.7 ± 46.4<br>p>0.999*             | 49 ± 4.5<br>p=0.989*<br>p=0.979†                      | 34 ± 4.3<br>p=0.983*<br>p=0.969†                   | 38.7 ± 9<br>p=0.985*<br>p=0.972†                      | 724 ± 12.5<br>p=0.408*<br>p=0.478†                         | 536.3 ± 86.6<br>p=0.900*<br>p=0.936†                       | 4541 ± 147.1<br>p=0.910*<br>p=0.945†                       |
| <b>IL-1β</b>    | 22 ± 4.3     | 118.3 ± 27<br>p>0.999*               | 32.3 ± 2.5<br>p>0.999*<br>p>0.999†                    | 23.3 ± 2.5<br>p>0.999*<br>p>0.999†                 | 52.7 ± 4.7<br>p>0.999*<br>p>0.999†                    | 456.7 ± 15.3<br>p=0.543*<br>p=0.812†                       | 553 ± 96.2<br>p=0.278*<br>p=0.543†                         | 372.3 ± 54.8<br>p=0.783*<br>p=0.952†                       |
| <b>TNF-α</b>    | 30 ± 5.5     | 352.7 ± 40.7<br>p=0.847*             | 49.3 ± 13.5<br>p>0.999*<br>p=0.884†                   | 21 ± 9.5<br>p>0.999*<br>p=0.827†                   | 24.3 ± 11<br>p>0.999*<br>p=0.835†                     | 6098.7 ± 532<br><b>p&lt;0.001*</b><br><b>p&lt;0.001†</b>   | 6119 ± 204.4<br><b>p&lt;0.001*</b><br><b>p&lt;0.001†</b>   | 5411.3 ± 509.1<br><b>p&lt;0.001*</b><br><b>p&lt;0.001†</b> |

\*vs. Uninfected, †vs. *M. tb* R179

## Reference

1. Harper, C. J., Hayward, D., Kidd, M., Wiid, I. & van Helden, P. Glutamate dehydrogenase and glutamine synthetase are regulated in response to nitrogen availability in *Mycobacterium smegmatis*. *BMC Microbiology* **10**, 138 (2010).
2. Harper, C. J., Hayward, D., Kidd, M., Wiid, I. & van Helden, P. Glutamate dehydrogenase and glutamine synthetase are regulated in response to nitrogen availability in *Mycobacterium smegmatis*. *BMC Microbiol* **10**, 138 (2010).
3. Viljoen, A. J., Kirsten, C. J., Baker, B., Helden, P. D. van & Wiid, I. J. F. The Role of Glutamine Oxoglutarate Aminotransferase and Glutamate Dehydrogenase in Nitrogen Metabolism in *Mycobacterium bovis* BCG. *PLOS ONE* **8**, e84452 (2013).
4. Viljoen, A. J., Kirsten, C. J., Baker, B., van Helden, P. D. & Wiid, I. J. F. The Role of Glutamine Oxoglutarate Aminotransferase and Glutamate Dehydrogenase in Nitrogen Metabolism in *Mycobacterium bovis* BCG. *PLoS One* **8**, (2013).
5. Johnson, R. *et al.* An outbreak of drug-resistant tuberculosis caused by a Beijing strain in the western Cape, South Africa. *Int. J. Tuberc. Lung Dis.* **10**, 1412–1414 (2006).
6. Katibah, G. E. *et al.* tRNA binding, structure, and localization of the human interferon-induced protein IFIT5. *Mol. Cell* **49**, 743–750 (2013).
